1 **An interplay of population size and environmental heterogeneity**  
2 **explains why fitness costs are rare**

3 Yashraj Chavhan<sup>1</sup>, Sarthak Malusare<sup>1,2</sup>, and Sutirth Dey<sup>1</sup>. \*

4 <sup>1</sup>Indian Institute of Science Education and Research (IISER) Pune, Dr Homi Bhabha Road,  
5 Pashan, Pune, Maharashtra, 411008, India.

6 <sup>2</sup>Present address: Gaia Doctoral School, Institut des sciences de l'évolution (ISEM) 1093-  
7 1317 Route de Mende, 34090, Montpellier, France.

8 \*Corresponding author: Sutirth Dey, Biology Division, Indian Institute of Science-Education  
9 and Research Pune, Dr Homi Bhabha Road, Pune, Maharashtra 411 008, India.

10 Phone: +91-20-25908054. Email: s.dey@iiserpune.ac.in

11

12 **Emails:** yashraj.chavhan@students.iiserpune.ac.in (YC);  
13 sarthak.malusare@students.iiserpune.ac.in (SM)

14

15 **Author contributions**

16 YC and SD designed the study. YC and SM conducted the experiments. YC analysed the data.  
17 YC and SD wrote the manuscript with inputs from SM.

18

19 **Keywords:** Costs of adaptation, whole-genome whole-population sequencing, mutation  
20 supply, fluctuating environments, ecological specialization, experimental evolution,  
21 maladaptation, mutation fixation

## 22 **Abstract**

23 Theoretical models of ecological specialization commonly assume that adaptation to one  
24 environment leads to fitness reductions (costs) in others. However, empirical studies often fail  
25 to detect such costs. We addressed this conundrum using experimental evolution with  
26 *Escherichia coli* in several homogeneous and heterogeneous environments at multiple  
27 population sizes. We found that in heterogeneous environments, smaller populations paid  
28 significant costs, but larger ones avoided them altogether. Contrastingly, in homogeneous  
29 environments, larger populations paid more costs than the smaller ones. Overall, large  
30 population sizes and heterogeneous environments led to cost avoidance when present together  
31 but not on their own. Whole-genome whole-population sequencing revealed that the  
32 enrichment of multiple mutations within the same lineage (and not subdivision into multiple  
33 distinct specialist subpopulations) was the mechanism of cost avoidance. Since the conditions  
34 revealed by our study for avoiding costs are widespread, it explains why the costs expected in  
35 theory are rarely detected in experiments.

## 36 **Introduction**

37 Costs of adaptation, also known as ‘fitness costs’ and ‘true trade-offs,’ entail that a fitness  
38 increase in one environment leads to a fitness decline in another (Bono *et al.* 2017). Such costs  
39 are instrumental in understanding why species tend to favour a particular set of environmental  
40 conditions over others (Fry 1996; Bono *et al.* 2017). Apart from answering such fundamental  
41 questions in evolutionary ecology, understanding fitness costs can also help in combating  
42 practical challenges like the rampant spread of antibiotic resistance (Andersson & Hughes  
43 2010) and forecasting how species would respond to climate change (Wallenstein & Hall  
44 2012). Although such costs are a fundamental assumption of numerous models of ecological  
45 specialization (Levins 1968; Futuyma & Moreno 1988; Fry 1996), a large number of  
46 experimental evolution studies spanning diverse taxa have failed to detect them (Rausher 1984;  
47 Coustau *et al.* 2000; Vasilakis *et al.* 2009; Vila-Aiub *et al.* 2009; Friman & Buckling 2013).  
48 Consequently, explaining this rarity of detectable fitness costs has been a major challenge for  
49 evolutionary studies over the last two decades (Joshi & Thompson 1995; Fry 1996; Agrawal *et*  
50 *al.* 2010; Remold 2012).

51 Here we investigate the evolutionary emergence and avoidance of fitness costs in asexual  
52 microbial populations, which have proven to be convenient model systems for experimental  
53 evolution studies over hundreds of generations (Kassen 2014; Bono *et al.* 2017). Whereas  
54 numerous microbial experimental evolution studies have reported the absence of detectable  
55 fitness costs altogether, several others have found such costs in some microbial populations but  
56 not in others (see Table S1 for a detailed list).

57 An important but trivial explanation for the failure to find fitness costs is the absence of any  
58 real costs altogether (Coustau *et al.* 2000). Indeed, some recent investigations have found the  
59 pleiotropy of new mutations to be largely positive and not negative (*i.e.*, costly) (Sane *et al.*

60 2018). More importantly, the extant literature offers three distinct explanations as to why  
61 fitness costs may exist but remain undetected in empirical studies (Velicer & Lenski 1999;  
62 Coustau *et al.* 2000). First, costs can be detected only under certain environmental conditions  
63 which the experimental setup may fail to provide (Coustau *et al.* 2000; Agrawal *et al.* 2010;  
64 Kassen 2014). Second, it is a statistically demanding task to detect negative pleiotropy (aka  
65 antagonistic pleiotropy), the very foundation of fitness costs, which entails that a mutation that  
66 is beneficial in one environment is deleterious in another. This is because the statistical  
67 significances of both the beneficial and deleterious effects need to be established  
68 simultaneously for detecting costs. If the experiment does not have enough statistical power to  
69 detect these opposite effects simultaneously, costs would not be detected (Coustau *et al.* 2000;  
70 Bono *et al.* 2017). Third, the emergence of fitness costs is expected to require a threshold  
71 amount of time; such costs may appear only after several thousand generations of microbial  
72 evolution have passed (Velicer & Lenski 1999; Jasmin & Zeyl 2013; Satterwhite & Cooper  
73 2015), and therefore would be detectable only in very long-term experimental evolution  
74 studies.

75 A recent meta-analysis of microbial experimental evolution studies provides a new explanation  
76 for the emergence of fitness costs based on environmental heterogeneity, suggesting that  
77 environments imposing a single (homogeneous) selection pressure frequently lead to fitness  
78 costs that can be avoided in heterogeneous environments (which fluctuate across multiple  
79 individual selection pressures) (Bono *et al.* 2017). Antagonistic pleiotropy can evolve freely if  
80 the environment does not allow the ensuing costs of adaptation to be expressed. Since selection  
81 would be blind to the antagonistic pleiotropic effects if the environment does not change,  
82 fitness costs are more likely to appear in homogeneous environments with a single selection  
83 pressure as compared to heterogeneous environments with multiple fluctuating selection  
84 pressures.

85 Unfortunately, the above prediction holds only weakly as many microbial experimental  
86 evolution studies have failed to find lower costs in heterogeneous environments as compared  
87 to homogeneous ones (Jasmin & Kassen 2007b; Presloid *et al.* 2008; Friman & Buckling 2013;  
88 Ketola & Saarinen 2015). This opens up the possibility that factors other than environmental  
89 heterogeneity may be important in shaping the emergence of fitness costs. One such factor is  
90 populations size, which has been shown to be important in shaping the correlated changes in  
91 populations' fitness in alternative environments (Chavhan *et al.* 2019a, 2020). For example, a  
92 recent study showed that larger populations evolving in a homogeneous environment  
93 containing a single carbon source suffer greater fitness costs in alternative environments  
94 (Chavhan *et al.* 2020). These results could be explained with a combination of two notions.  
95 First, adaptation in very large populations is primarily driven by beneficial mutations of large  
96 effect sizes (Desai & Fisher 2007a; Chavhan *et al.* 2019b). Second, larger beneficial mutations  
97 are expected to carry heavier disadvantages in alternative environments (Lande 1983; Orr &  
98 Coyne 1992).

99 Taken together, the extant literature suggests that environmental heterogeneity and population  
100 size are two important factors that can potentially shape the evolution of fitness costs. However,  
101 the effects of the interaction of these two factors remains unknown. Interestingly, this  
102 interaction can be expected to play out in two contrasting ways.

103 First, if mutational pleiotropy across environmental components is largely antagonistic, and  
104 large benefits in one context entail large costs in another, the multiplicity of selection pressures  
105 in a heterogeneous environment would prevent the enrichment of costly large effect mutations,  
106 even if the latter were accessible to the population. This is akin to Fisher's formulation of  
107 micromutationism where adaptation is expected to proceed via mutations of small  
108 effects (Fisher 1930). In this scenario, in heterogenous environments, both large and small  
109 populations are expected to pay similar costs.

110 Second, in a heterogeneous environment, evolving in larger numbers can make populations  
111 stumble upon greater number of mutations that are beneficial in a given environmental state,  
112 but not necessarily in others. The presence of multiple mutations within an individual  
113 belonging to a large asexual population has the potential to offset the costs carried by individual  
114 mutations in isolation. In this scenario, adapting in larger numbers in a heterogeneous  
115 environment would lead to the avoidance of fitness costs. Interestingly, bacterial experimental  
116 evolution studies conducted in heterogeneous environments agree with this notion: studies on  
117 smaller populations tend to detect costs, while those using larger populations do not (Fig 1a).

118 Stated differently, in homogeneous environments, larger populations are expected to pay  
119 heavier costs of adaptation (Chavhan *et al.* 2020). However, in heterogeneous environments,  
120 larger populations may either pay similar or lower costs as compared to smaller populations,  
121 depending upon which one of the above two possibilities dominates the underlying adaptive  
122 dynamics. To the best of our knowledge, no studies in the existing literature have tested these  
123 contrasting expectations empirically.

124 Here we study how environmental heterogeneity and population size interact with each other  
125 to influence the evolutionary emergence or avoidance of fitness costs. To this end, we use  
126 experimental evolution with clonally derived *Escherichia coli* populations in both  
127 heterogeneous and homogeneous environments at different population sizes for ~480  
128 generations. We investigate if population size has similar effects on fitness costs in  
129 homogeneous and heterogeneous environments. We also test if evolving in a heterogeneous  
130 environment can lead to cost avoidance, regardless of the population size. We show that  
131 population size influences costs in opposite ways in homogeneous and heterogeneous  
132 environments. Interestingly, large population size and heterogeneous environments lead to  
133 evolutionary avoidance of costs when present simultaneously but not in isolation. Mutational  
134 frequency distributions obtained by whole-genome whole-population sequencing revealed how

135 environmental heterogeneity led to cost avoidance in large populations but not in smaller ones.  
136 Based on these observations, we propose a new explanation for the rarity of fitness costs in  
137 evolutionary and ecological studies, which can account for several contrasting observations  
138 made in the last two decades of microbial experimental evolution.

**a** Detection of fitness costs in heterogeneous environments in extant bacterial experimental evolution literature

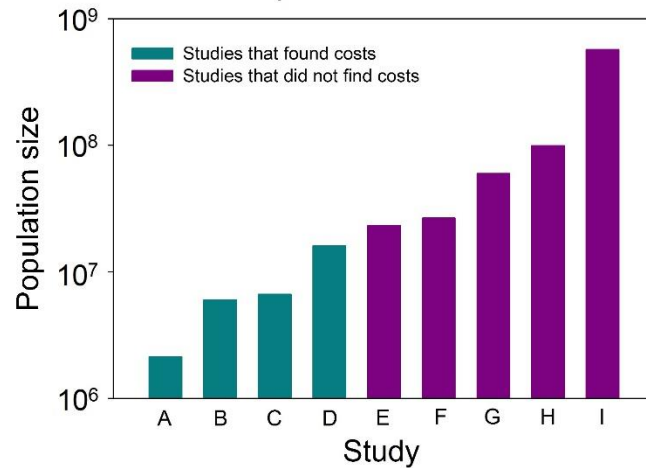

**b** Schematic representation of the experimental evolution in this study

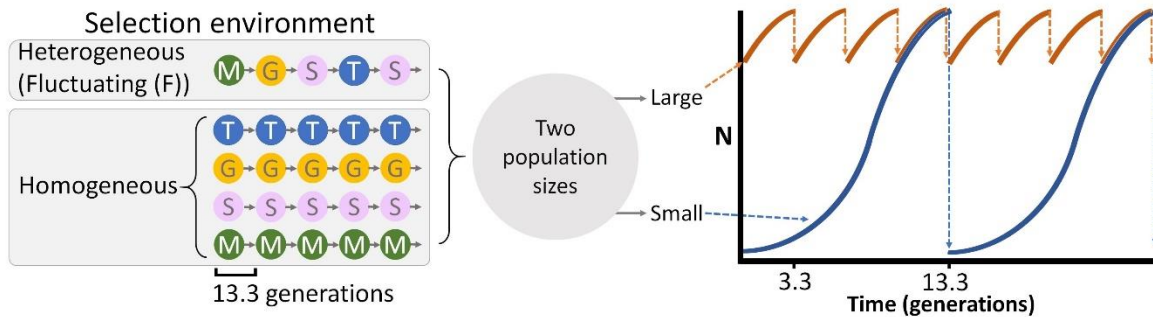

139

140 **Fig. 1. (a)** The harmonic mean sizes of laboratory populations in existing bacterial  
141 experimental evolution studies on fitness costs conducted in heterogeneous environments. See  
142 Supplementary Text (ST.1) for the details of the studies shown in the ordinate. **(b)** A schematic  
143 representation of our evolution experiment. The experimental populations were maintained in  
144 five distinct environments at two different population sizes. T, G, S, and M refer to thymidine,  
145 galactose, sorbitol, and maltose, respectively. N stands for absolute population size. In the  
146 heterogeneous (randomly fluctuating environment, the identity of the sole carbon source  
147 changed every 13.3 generations. See the text for further details.

## 148 **Results and Discussion**

### 149 *Large population size and heterogeneous environments led to cost avoidance when present* 150 *together but not on their own*

151 We carried out experimental evolution with clonally derived *E. coli* populations in five  
152 different nutrient limited environmental conditions at two different population sizes for ~480  
153 generations (Fig. 1b). This design gave rise to ten different evolutionary regimens (FL, FS, TL,  
154 TS, GL, GS, SL, SS, ML, and MS; where the first letter represents the sole carbon source in a  
155 regimen's selection environment (fluctuating (F), thymidine (T), galactose (G), sorbitol (S),  
156 and maltose (M)) while the second letter stands for its population size (L (large) and S (small)).  
157 The harmonic mean population size for our principal treatment (F, Fluctuating (heterogeneous)  
158 environment) was  $\sim 1.01 \times 10^8$  for the large (FL) populations and  $\sim 4.04 \times 10^5$  for the small (FS)  
159 populations. Moreover, the adaptively relevant population sizes for L and S in this treatment  
160 were approximately equal to  $9.13 \times 10^6$  and  $2.28 \times 10^3$ , respectively (Chavhan *et al.* 2019b).  
161 In the FL and FS regimens, the identity of the sole carbon source fluctuated randomly across  
162 four distinct states (T, G, S, and M) approximately every ~13.3 generations (Fig. 1b). Our study  
163 also involved four distinct homogeneous environmental controls, each with an unchanging  
164 identity of the sole carbon source corresponding to one of T, G, M, or S (Fig. 1b). With six  
165 replicates per regimen, our experiment involved 60 independently evolving populations in  
166 total. All the large (L) populations faced a periodic bottleneck ratio of 1:10 while all the small  
167 (S) populations experienced a periodic bottleneck of 1:10<sup>4</sup>. We manipulated the timing and  
168 frequency of bottlenecks to ensure that large and small populations did not spend significantly  
169 different times in the stationary phase (Fig. 1b; see Methods for details).

170 We conducted growth measurements to obtain high-resolution growth curves for all the 60  
171 independently evolving populations in all four distinct sole carbon sources (T, G, M, and S) at



172 the end of the evolution experiment. We used the maximum growth rate ( $R$ ) as the measure of  
173 fitness (Leiby & Marx 2014; Karve *et al.* 2015; Chavhan *et al.* 2019a, b) (see Methods for  
174 details). We identified the occurrence of significant costs of adaptation in our experimental  
175 populations as cases that showed adaptation to one environment and simultaneous  
176 maladaptation to another. To this end, we carried out single sample  $t$ -tests with the ancestral  
177 fitness level (scaled to 1) as the reference value. We then corrected for family-wise error rates  
178 using the Holm-Šidák procedure (Abdi 2010). Cases with fitness  $> 1$  (corrected  $P < 0.05$ ) were  
179 identified as adaptations; analogously, cases with fitness  $< 1$  (corrected  $P < 0.05$ ) were  
180 identified as maladaptations.

181 We found that twenty-one out of the forty possible combinations of regimen and assay  
182 environment showed significant fitness changes as compared to the common ancestor  
183 (corrected  $P < 0.05$ ; see Table S2). We used this information to analyse the effects of two  
184 factors that are expected to be important in shaping the evolution of fitness costs in bacterial  
185 populations, namely population size and environmental heterogeneity.

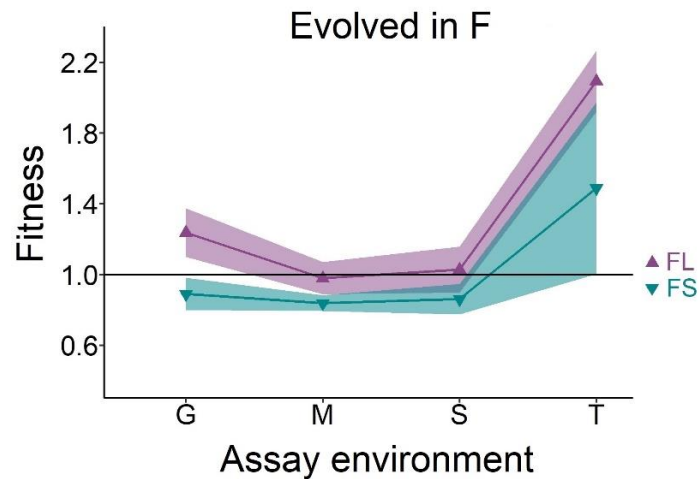

186

187 **Fig. 2. Reaction norms of fitness of large (FL) and small (FS) populations evolved in the**  
188 **heterogeneous environment across the four environmental states faced during evolution.**  
189 G, M, S, and T represent galactose, maltose, sorbitol, and thymidine, respectively. The error  
190 bands represent 95% CI (*t*-distribution). The solid black line represents the ancestral fitness.  
191 FL adapted simultaneously to two environments (G and T) and avoided the costs of adaptation  
192 across all the environmental pairs under consideration. Contrastingly, FS adapted to T and paid  
193 costs of adaptation in the other three environments (G, M, and S). See Tables S2 and S3 for  
194 detailed statistics.

195 In the heterogeneous (F) environment, the large populations (FL) completely avoided costs  
196 across all the environmental pairs under consideration (Fig. 2; Tables S2 and S3). FL adapted  
197 simultaneously to both T and G and did not show a significant change in fitness (vis-à-vis the  
198 common ancestor) in S and M (Fig. 2; Tables S2 and S3). On the other hand, the small  
199 populations evolved in the heterogeneous environment (FS) adapted only to T, becoming  
200 maladapted to (and hence paid a cost of adaptation in) the other three sole carbon sources (G,  
201 S, and M) (Fig. 2; Tables S2 and S3). Taken together, when evolved in the heterogeneous (F)  
202 environment, the small populations paid greater costs than the large populations, with the latter  
203 avoiding all costs altogether.

204 Interestingly, in the homogeneous (control) environments, the above pattern of costs reversed  
205 completely. Here, the large populations paid heavier costs of adaptation than the smaller ones  
206 (Fig. 3; the fitness changes pertaining to selection in homogeneous T and G environments have

207 been reported previously (Chavhan *et al.* 2020)). Specifically, when evolved in homogeneous  
208 T, both TL and TS paid significant costs. Interestingly, the costs suffered by TL were  
209 significantly greater than those suffered by TS, regardless of the environmental pair in question  
210 (Fig. 3; Tables S2 and S4). When evolved in homogeneous G, only GL paid costs of adaptation  
211 (GS failed to adapt significantly to the homogeneous G selection environment). None of the  
212 populations evolved in homogeneous M and S environments adapted to their respective  
213 selection environments, regardless of the population size; hence, there were no costs of  
214 adaptation in these regimens (Fig. 3; Tables S2 and S4).

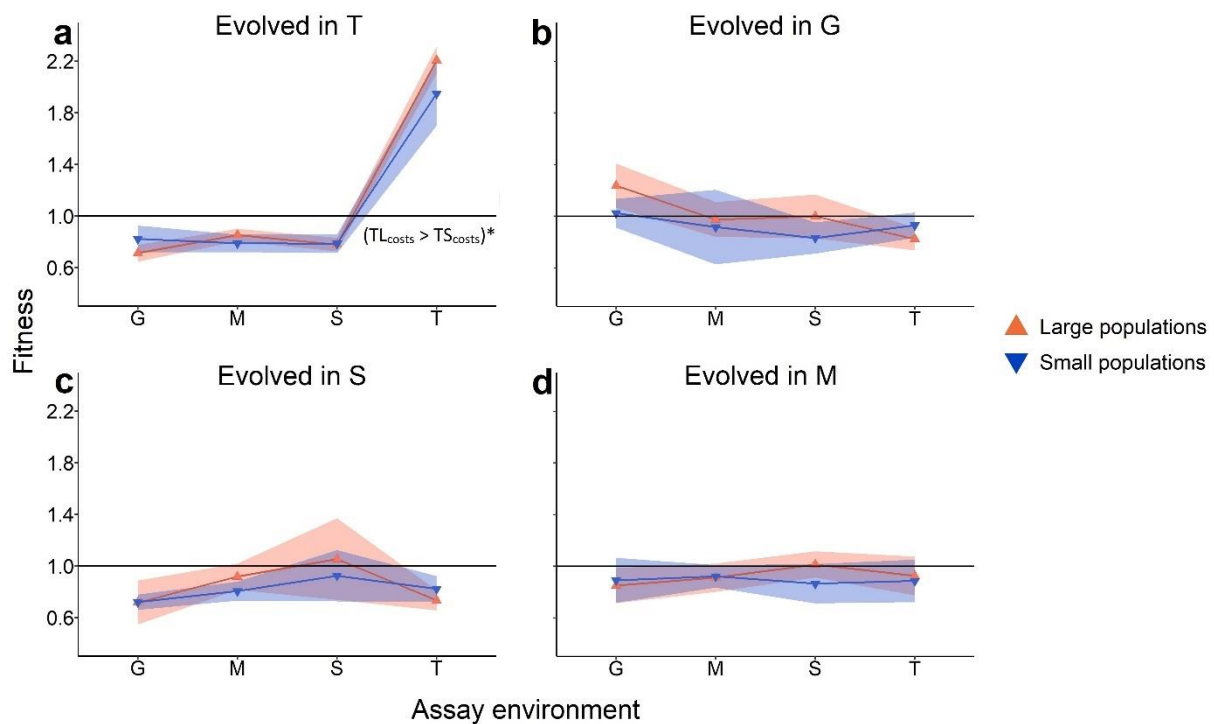

215

216 **Fig. 3. Reaction norms of fitness of populations evolved in homogeneous environments.**  
217 G, M, S, and T represent galactose, maltose, sorbitol, and thymidine, respectively. The error  
218 bands represent 95% CI (*t*-distribution). The solid black line represents the ancestral level of  
219 fitness. See Tables S2 and S3 for detailed statistics. (a) When evolved in T, both the large (TL)  
220 and small populations paid costs in the other three environments (G, M, and S). The costs paid  
221 by TL were significantly greater than those paid by TS (Chavhan *et al.* 2020). (b) GL paid  
222 significant costs in T. GL did not have significantly different fitness relative to the common  
223 ancestor in M and S. GS did not adapt significantly to G. Hence there were no costs of  
224 adaptation in this case. (c) Both SL and SS failed to show significantly different fitness with  
225 respect to the common ancestor. Hence there were no costs of adaptation in either SL or SS.  
226 (d) Neither ML nor MS had significantly different fitness with respect to the common ancestor.  
227 Hence there were no costs of adaptation in either ML or MS.

228 Homogeneous T and G environments are known to exhibit reciprocal fitness trade-offs with  
229 each other (Chavhan *et al.* 2020). In other words, adaptation to T is accompanied by  
230 maladaptation to G, and vice-versa (Chavhan *et al.* 2020). Agreeing with this notion, we found  
231 that when evolved in the heterogeneous environment (where the sole carbon source fluctuated  
232 randomly), the small populations (FS) indeed suffered from the T-G costs. Specifically, FS  
233 adapted to T but became significantly maladapted to G (Fig. 2; Table S3). Contrastingly, the  
234 large populations evolved in the heterogeneous environment (FL) completely bypassed the  
235 expected T-G trade-off, adapting simultaneously to both the carbon sources, thereby avoiding  
236 the costs of adaptation across this environmental pair (Fig. 2, Table S3).

237 Taken together, evolution in the ten regimens of our study reveals that an interplay of  
238 environmental heterogeneity and population size shaped how fitness costs evolved. We found  
239 that population size had opposite effects on costs of adaptation during evolution in  
240 heterogeneous versus homogeneous environments. While in homogeneous environments,  
241 larger populations evolved greater costs; contrastingly, in heterogeneous environments, smaller  
242 populations paid greater costs while larger ones avoided them altogether. Importantly, neither  
243 environmental heterogeneity nor population size could sufficiently explain the emergence (or  
244 avoidance) of costs on their own (compare Figs. 2 and 3). Overall, costs could be avoided  
245 altogether only when heterogeneous environments and large population size were present  
246 simultaneously (the FL regimen).

247 ***Conventional explanations cannot account for the avoidance of fitness costs in our***  
248 ***experiments***

249 Conventional notions about the rarity of detectable fitness costs failed to explain our  
250 observations. One such explanation is that perhaps the experiment did not provide the relevant

251 conditions for costs to be expressed (Coustau *et al.* 2000; Agrawal *et al.* 2010; Kassen 2014).  
252 This was not the case in our experiments as several environmental pairs showed significant  
253 costs of adaptation. Another potential explanation is that the substantial statistical demands of  
254 establishing antagonistic pleiotropy were not met (Coustau *et al.* 2000; Anderson *et al.* 2013;  
255 Ågren *et al.* 2013; Bono *et al.* 2017). However, we were able to statistically detect costs caused  
256 by antagonistic pleiotropy in multiple regimens and in both homogeneous and heterogeneous  
257 environments (Figs 2 and 3). Finally, an often-quoted explanation for the lack of fitness costs  
258 is the relatively short duration of the experimental evolution study (Velicer & Lenski 1999;  
259 Jasmin & Kassen 2007a; Jasmin & Zeyl 2013; Satterwhite & Cooper 2015; Schick *et al.* 2015).  
260 However, this was simply not true in our case, as several fitness costs had already emerged  
261 over the ~480 generations of selection.

262 As discussed earlier, evolution in heterogeneous environments is expected to lead to lower  
263 costs than evolution in homogeneous environments because the former offer multiple dynamic  
264 selection pressures (Bono *et al.* 2017). Although our temporally heterogeneous (F)  
265 environment contained only a single carbon source at any given point of time, the identity of  
266 this carbon source fluctuated randomly over four states every ~13.3 generations. Therefore,  
267 selection was not expected to be blind to the pleiotropic fitness effects of mutations across T,  
268 G, M, and S. Despite evolving in such a heterogeneous environment, the FS populations paid  
269 significant fitness costs. Thus, Fig. 2 shows that contrary to the expectations of the extant  
270 literature (Bono *et al.* 2017), the presence of multiple dynamic selection pressures can be  
271 insufficient for cost avoidance.

272 Interestingly, evolutionary success in fluctuating environments is reflected by the geometric  
273 mean (GM) fitness across the states about which the environment oscillates (and not necessarily  
274 the arithmetic mean fitness) (Orr 2007; Kassen 2014). We found that across G, M, S and T, FL  
275 had significantly greater GM fitness than both FS and the common ancestor (Fig. S1a; Table

276 S5). In contrast, the GM fitness of FS was not significantly different from the ancestral value  
277 (Fig. S1a; S5). Furthermore, as expected, evolution in homogeneous (unchanging)  
278 environments did not result in increased GM fitness above the ancestral value, regardless of  
279 the population size (Fig. S1b and Table S5). FL was better prepared to face the fluctuating  
280 environment than all the eight homogeneous environmental regimens (Tables S6 and S8)  
281 Surprisingly, the preparedness of FS to face the environmental fluctuations across G, M, S and  
282 T was similar to most homogeneous environment regimens (Tables S7 and S8). These  
283 observations highlight the key role played by population size in shaping fitness relationships  
284 across the component states of heterogeneous environments. Thus, the mere presence of  
285 multiple dynamic selective pressures in a heterogeneous environment was not enough to  
286 prevent costs of adaptation, which ultimately precluded any significant increase in the  
287 geometric mean fitness of FS.

### 288 *The genetic basis of cost avoidance*

289 The observation that FS suffered substantial costs that were completely avoided by FL can be  
290 explained by the notion that in the presence of multiple selection pressures, a threshold amount  
291 of mutational supply is required to avoid costs. Owing to their relatively larger size, FL are  
292 expected to have much higher mutational supply as compared to FS. We hypothesised that FL  
293 enriched a larger number of mutations than FS, which made them adapt to multiple carbon  
294 sources, thereby avoiding the costs that were paid by the FS populations. To validate this  
295 hypothesis, we performed end-point whole-genome whole-population sequencing in three  
296 randomly chosen populations each from FL and FS. For our analysis, we considered only  
297 mutations that had a frequency  $\geq 10\%$  (Lang *et al.* 2013; Bailey *et al.* 2015; Copin *et al.* 2016;  
298 McDonald *et al.* 2016; Swings *et al.* 2017). Theory suggests that any mutation rising to  
299 frequencies  $\geq 10\%$  within 480 generations in any of our treatment populations is likely to be  
300 beneficial and highly unlikely to be neutral or deleterious (Desai & Fisher 2007a; Good *et al.*

301 2012; Cooper 2018). Consistent with this notion, we found that the number of mutations rising  
302 to frequencies  $\geq 10\%$  was much greater in FL as compared to FS (Fig. 4).

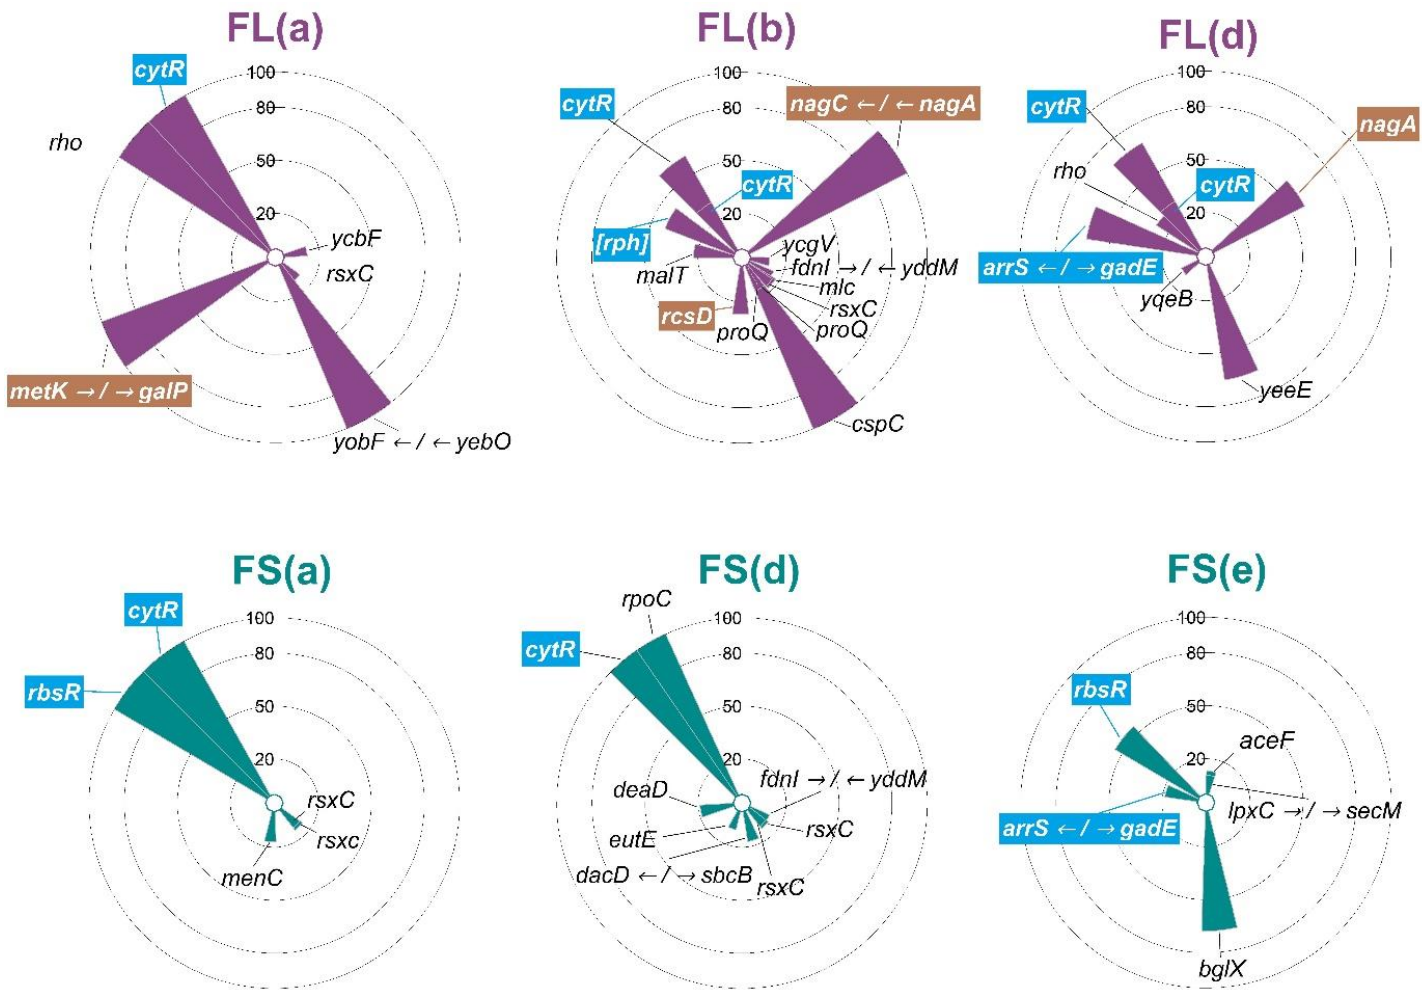

304 **Fig. 4. The spectrum of mutations observed in FL and FS after 480 generations.** Three  
305 randomly chosen replicate populations each of FL (upper row) and FS (lower row) were  
306 subjected to whole-genome whole-population sequencing. The radial bars are located at the  
307 genomic position of the observed mutations and their heights represent the corresponding  
308 mutational frequency. The mutated loci known to be associated with thymidine (T) utilization  
309 are highlighted in blue while those associated with galactose (G) utilization are highlighted in  
310 brown. See Table S9 for details.

311 A detailed description of the various observed mutations is given in Table S9, while the key  
312 observations and their interpretations are described below.

313 We found that the loci mutated in FL are known to be associated with the uptake and/or  
314 metabolism of either G or T in the extant literature. Contrastingly, the loci mutated in FS had  
315 known links to T uptake and/or metabolism but none with that of G (Fig. 4). This agrees with  
316 the observation that FL adapted to both T and G while FS adapted to T but not to G.

317 Interestingly, some mutated loci that could be linked with T adaptation were common across  
318 FL and FS while others were found exclusively in either FL or FS. Remarkably, five out of the  
319 six sequenced populations (3/3 in FL and 2/3 in FS) had high frequencies of mutations in *cytR*  
320 (Fig. 4), an important regulator of thymidine metabolism that is instrumental in the regulation  
321 of pyrimidine uptake and degradation (Hammer-Jespersen & Munch-Petersen 1975; Valentin-  
322 Hansen *et al.* 1996). Similarly, insertions in the upstream regulator region of *gadE*, a  
323 transcriptional activator that plays an important role in thymidine metabolism (Ketcham 2019),  
324 were found to be enriched in one replicate of both FL and FS.

325 A deletion in the expressed but non-active exoribonuclease *rph* got enriched in an FL  
326 population, but was not found in any of the FS populations (Fig. 4). Such a deletions is likely  
327 to affect the expression of *pyrE*, a key gene in thymidine biosynthesis whose promoter lies  
328 within *rph* (Gama-Castro *et al.* 2016; Wytock *et al.* 2018). On the other hand, two out of the  
329 three sequenced FS populations showed mutations in *rbsR*, the ribose operon repressor that has  
330 known links to thymidine metabolism (Shimada *et al.* 2013). Interestingly, mutations in *rbsR*  
331 did not get enriched in any of the three FL populations.

332 The mutations identified to be associated with adaptation in Gal were found exclusively in FL  
333 (none in FS) and were distributed across diverse loci. For example, mutations influencing the  
334 expression of *nagA* and *nagC* genes were found at frequencies > 50% in two out of the three  
335 sequenced FL populations (Fig. 4). Mutations in these genes are known to increase fitness in  
336 galactose minimal media (Soupene *et al.* 2003; El Qaidi *et al.* 2009). Similarly, a mutation in



337 the operator of *galP*, the galactose:H<sup>+</sup> symporter (a gene that is instrumental in galactose  
338 uptake) got fixed in one FL population (Fig. 4).

339 We also found a high frequency mutation directly associated with maltose utilization in one of  
340 the FL populations, but none in FS (Fig. 4, Table S9). The presence of this mutation could  
341 explain the avoidance of costs in M that could have arisen due to T-associated mutations in FL.  
342 Furthermore, we also found several mutations in genes with widespread effects that were not  
343 specific to the uptake or metabolism of the carbon sources used in this study (Fig. 4, Table S9).  
344 Since fitness in T has been shown to be negatively correlated with fitness in G (Chavhan *et al.*  
345 2020), mutations beneficial in T are likely to be deleterious in G, and vice versa. Hence, the  
346 presence of several T-associated mutations at high frequencies in FS can explain their  
347 maladaptation to G. Moreover, we did not find any known G-associated mutations in FS that  
348 could alleviate the putative maladaptive effects of T-associated mutations in G. Had there been  
349 no G-associated mutations in FL, the enrichment of a relatively larger number of T-associated  
350 mutations should have led to greater maladaptation of FL in G. However, we found several G-  
351 associated mutations at high frequencies in FL that can explain these populations' adaptation  
352 to G.

353 The presence of both T- and G-associated mutations in FL agrees with the observation that this  
354 regimen adapted to both T and G. The large population size of FL could have allowed them to  
355 stumble upon highly rare mutations that were simultaneously beneficial in multiple  
356 environments (Li *et al.* 2019) (T and G in this case). However, the convergent enrichment of  
357 multiple mutations at the level of loci (e.g., within *cytR* and upstream of *gadE* (Fig. 4)) in FL  
358 and FS makes such a possibility unlikely. Although the investigation of such individual and  
359 epistatic effects of mutations on fitness across different environments is interesting in its own

360 right, it is outside the scope of our study, which is primarily targeted towards unravelling the  
361 interactive effects of population size and environmental heterogeneity in shaping fitness costs.  
362 Taken together, the genomic changes enriched during evolution in the heterogeneous  
363 environment were congruent with the phenotypic observation that the large (FL) avoided all  
364 the fitness costs that were suffered by the small (FS) populations. Having discussed the match  
365 between our phenotypic and genotypic observations, we now turn to the population genetic  
366 drivers that could have shaped evolution in our experiments.

367 Antagonistic pleiotropy can readily explain the positive relationship between population size  
368 and fitness costs observed in homogeneous environments (Rose & Charlesworth 1980; Cohan  
369 *et al.* 1994; Holt 1996; Cooper & Lenski 2000; Cooper 2014) (Fig. 3). Since these populations  
370 faced only one carbon source throughout the experiment, their evolution was blind to fitness  
371 changes in other carbon sources. The pleiotropic disadvantages of beneficial mutations are  
372 generally expected to be correlated with their direct effects (Lande 1983; Orr & Coyne 1992;  
373 Otto 2004; Chavhan *et al.* 2019a). Since the larger asexual populations adapt primarily via  
374 beneficial mutations with relatively greater direct effect sizes (Desai *et al.* 2007; Desai & Fisher  
375 2007b; Sniegowski & Gerrish 2010; Chavhan *et al.* 2019b), adapting to homogeneous  
376 environments in larger numbers should lead to heavier costs of adaptation, as observed in our  
377 study (Fig. 3) (Chavhan *et al.* 2020).

378 When evolved in the heterogeneous (fluctuating) environment, smaller (FS) populations paid  
379 significant costs of adaptation across three distinct environmental pairs under consideration,  
380 but the larger (FL) populations avoided costs altogether. As described above, FS suffered  
381 significantly from T-G trade-offs while FL bypassed them. Interestingly, despite facing both T  
382 and G as the sole sources of carbon for equal number of generations (~120), the T-G trade-off  
383 manifested itself in FS as adaptation to T and maladaptation to G. To explain this asymmetry

384 of fitness changes across T and G, we note that despite evolving in homogeneous G for ~480  
385 generations, GS could not adapt significantly to this environment. Contrastingly, TS increased  
386 their fitness in T by > 1.5-fold within the same period (Fig. 3). This shows that the size of our  
387 small-population regimens was sufficient to adapt significantly to T but not to G. Put  
388 differently, the scope of adaptation in T was much greater than that in G (Chavhan *et al.* 2020).  
389 This can explain why FS adapted to T but not to G. Analogous to TS, such adaptation of FS to  
390 T also led to significant maladaptation in the other three environments.

391 In contrast to the small populations, the large populations in our study had sufficient supply of  
392 mutations to adapt to G within ~480 generations (Fig. 3). Curiously, we also found that FS  
393 could adapt significantly to G despite encountering this particular environment intermittently  
394 for a total period of ~120 generations (Fig. 2). This observation was also supported by the  
395 genome-wide analysis of the evolutionary changes in this regimen, which revealed substantial  
396 enrichment of putative G-associated beneficial mutations (Fig. 4).

397 An important alternative explanation for cost avoidance in heterogeneous environments  
398 involves the divergence of the population in question into multiple subpopulations, each one  
399 specialized on a different environmental component (Kassen 2002, 2014). However, our  
400 genomic data suggest that this explanation of cost avoidance is unlikely in our study.  
401 Specifically, in one of the sequenced FL populations (FL(a)), multiple mutations went to  
402 fixation, one of which was in a locus known to be associated with galactose uptake/metabolism  
403 and another with that of thymidine (Fig. 4). Hence, the individuals in FL(a) simultaneously  
404 carried both putative G and putative T adaptations. In the second sequenced FL population  
405 (FL(b)), a putative G-associated mutation went to fixation and three putative T-associated  
406 mutations rose to the frequencies of 60.7%, 41.4%, and 32.3% respectively (Fig. 4, Table S9).  
407 Thus, the probability that an individual in FL(b) carried at least one of the three putative T  
408 mutations was 84.41%. Hence, the probability that a given individual in FL(b) simultaneously

409 carried a G- and T-associated mutation was 84.41%. Although the third sequenced FL  
410 population (FL(d)) did not show any fixation events, it enriched a putatively G-associated  
411 mutation at 57.70% and multiple putatively T-associated mutations at 68.5%, 63.0%, and  
412 30.9%, respectively (Fig. 4, Table S9). Hence, the probability that an individual in this  
413 population carried at least one T-associated mutation was 91.95%. Moreover, the probability  
414 of an FL(d) individual simultaneously carrying both G- and T-associated mutations is 53.05%.  
415 Thus, the high likelihoods of simultaneously showing G- and T-associated mutations FL  
416 suggests that it is unlikely that this regimen avoided costs by divergent specialization on  
417 individual carbon sources within populations.

418 Overall, these results demonstrate that the phenomenon of cost avoidance in heterogeneous  
419 (fluctuating) environments requires the supply of variation to be large enough to make use of  
420 multiple dynamic selection pressures.

## 421 *Implications*

422 Our observations offer a novel explanation for an important conundrum in evolutionary  
423 ecology, namely the rarity of detectable fitness costs in empirical studies. Specifically, we  
424 demonstrate a previously unreported interaction of population size and environmental  
425 heterogeneity that determines the evolutionary appearance (or avoidance) of fitness costs.  
426 These results can potentially explain how evolving populations can escape fitness costs despite  
427 substantial antagonistic pleiotropy across environmental states. Our study shows that the  
428 simultaneity of two conditions, namely large population size and heterogeneous environment,  
429 can avoid all the fitness costs that potentially evolve when these conditions are not present  
430 together. Finally, to our knowledge, this is the first experimental study to demonstrate that

431 multiple mutations can fix rapidly (within ~480 generations) in asexual populations evolving  
432 in highly dynamic heterogeneous environments, a possibility raised recently (Cvijović *et al.*  
433 2015), but discounted by older studies (Whitlock 1996; Kassen 2002). Remarkably, this  
434 phenomenon was observed in both FL and FS populations. This shows that such rapid fixation  
435 of multiple mutations in heterogeneous environments can happen in the face of both lenient  
436 and harsh population bottlenecks.

437 The environments of most natural populations of asexual microbes are known to be  
438 heterogeneous (Green & Bohannan 2006; Muscarella *et al.* 2019). Moreover, such natural  
439 asexual populations are also known to have extremely large sizes (Torsvik *et al.* 2002;  
440 Tenailon *et al.* 2010). Our results suggest that if the asexual population under consideration  
441 has a history of evolving in heterogeneous environments in large numbers, it is expected to  
442 have reached its current state after having avoided fitness costs during its past evolution.  
443 Therefore, if a sample from such a population is now employed to analyse fitness correlations  
444 in a single-generation study, such correlations may not be negative, and costs may not be found.  
445 Contrastingly, several laboratory evolution studies using unchanging (homogeneous)  
446 environments and large population sizes ( $> 10^6$  in terms of harmonic mean population size)  
447 have successfully detected fitness costs (Kassen & Bell 1998; Cooper & Lenski 2000; Cooper  
448 *et al.* 2001; Nilsson *et al.* 2004; Hall & Colegrave 2008; Presloid *et al.* 2008; Philippe *et al.*  
449 2009; Vasilakis *et al.* 2009; Bedhomme *et al.* 2012; Ensminger *et al.* 2012; Kubinak & Potts  
450 2013; Leiby & Marx 2014). This agrees with the interplay of population size and environmental  
451 heterogeneity revealed by our results, which predicts such a combination of constant  
452 environment and large populations to lead to significant costs.

453 Thus, apart from explaining why costs may not be detected in single-generation studies with  
454 natural isolates, our observations also explain why costs can still be detected if the artificially

455 controlled laboratory conditions remain constant over a few hundred generations in an  
456 evolution experiment.

457 Although the environments used in our experimental setup were nutritionally challenging  
458 minimal media, the explanation of our observations applies to the general notion of fitness  
459 costs across multiple environments in asexual microbial populations. In particular, our results  
460 can have important implications for understanding the rampant evolution and spread of  
461 antibiotic resistance, which has direct practical values. Mutations that confer resistance to  
462 antibiotics have been routinely shown to bear fitness costs in drug-free conditions (Andersson  
463 & Hughes 2010; Vogwill & MacLean 2015). Interestingly, resistant microbes mostly evolve  
464 in a heterogeneous environment that fluctuates randomly across antibiotic-laden and antibiotic-  
465 free conditions (Baquero *et al.* 1998). Our results predict that small populations evolving in  
466 heterogeneous environments suffer heavy fitness costs while large populations are likely to  
467 avoid them altogether (Fig. 2). Thus, even if most antibiotic resistance mutations carry a cost  
468 in drug-free conditions, large microbial population sizes stemming from lack of sanitary  
469 conditions and proper medical waste-disposal (Cantón *et al.* 2013) could themselves lead to  
470 vigorous spread of cost-free resistance.

## 471 **Methods**

### 472 *Experimental evolution*

473 We derived ten different evolutionary regimens from a single colony of *E. coli* MG1655 by  
474 culturing populations at two different sizes in five different environments as described above  
475 (see Supplementary Methods (SM.1) for more details regarding the ancestral strain and media  
476 compositions). Using the standard batch culture technique, we let all the 60 populations  
477 propagate as continuously shaken cultures (150 rpm) in 96 well plates maintained at 37° C. In

478 all the 60 populations, the culture volume was fixed at 300  $\mu$ l. Whereas the large (L)  
479 populations experienced a lenient periodic bottleneck (1:10, the small (S) populations faced a  
480 relatively harsher periodic bottleneck (1:10<sup>4</sup> dilution). We ensured that populations of different  
481 sizes did not remain in the stationary phase for significantly different time-periods by  
482 bottlenecking the L populations every 12 hrs (~3.3 generations), and the smaller ones every 48  
483 hrs (~13.3 generations). The selection protocol pertaining to the T and G populations has been  
484 reported in a previous study (Chavhan *et al.* 2020).

485

#### 486 ***Fitness quantification***

487 We conducted fitness measurements for all the 60 independently evolving populations in all  
488 four carbon sources (T, G, M, and S) at the end of the evolution experiment (~480 generations).  
489 To this end, we revived the cryo-stocks belonging to each of the 60 experimental populations  
490 in a common nutrient limited environment that was not encountered by any population during  
491 the ~480 generations of our experiment (glucose based M9 minimal medium) and allowed them  
492 to grow for 24 hours. Using a well-plate reader (Synergy HT, BIOTEK® Winooski, VT, USA),  
493 we then performed automated growth measurements on each of the 60 revived populations in  
494 all four different minimal media, each based on one of T, G, M, or S. Ensuring that the physical  
495 conditions during the fitness measurements were the same as the culture conditions (96 well  
496 plates shaken at 150 rpm and ambient temperature maintained at 37° C), we obtained growth  
497 readings every 20 minutes for 24 hours. We used optical density (OD) at 600 nm as the measure  
498 of population density.

499 Since the total number of growth curves was much larger than number of wells in the assay  
500 plate, we used a randomized complete block design (RCBD) for growth  
501 measurements (Milliken & Johnson 2009). Specifically, we assayed one replicate population of

502 each of the ten different evolutionary lines in all four environments on a given day. Since there  
503 were six replicates for each evolutionary line, we conducted growth measurements over six  
504 different days. We used the maximum growth rate (R) as the measure of fitness. We computed  
505 R as the maximum slope of the growth curve over a dynamic window of ten OD (600 nm)  
506 readings (Leiby & Marx 2014; Karve *et al.* 2015; Chavhan *et al.* 2019a, b). As described in the  
507 Results section, for each of the four sole carbon sources (G, M, S, and T), we used single  
508 sample t-tests to compare the fitness of each of the ten evolutionary regimens to that of the  
509 ancestor. Subsequently, we corrected for family-wise error rates using the Holm-Šidák  
510 procedure.

511 As described in the Supplementary Methods, we also investigated the changes in the geometric  
512 mean fitness across G, M, S, and T for all the ten evolutionary regimens (see SM.2 for details).

513

#### 514 ***Whole genome whole population sequencing***

515 For both the ancestor and the six randomly chosen evolved populations (three each from FL  
516 and FS), pellets obtained from overnight grown cultures were sent for sequencing to an external  
517 service provider. For each sample, the genomic DNA was isolated using c-TAB and phenol-  
518 chloroform extraction. This procedure was followed by RNAase A treatment. The quality and  
519 quantity of the isolated DNA samples was verified using a NanoDrop™ spectrophotometer  
520 (Thermo Fisher Scientific Inc., MA, USA). The isolated DNA samples were initially subjected  
521 to a further check by targeting the bacterial 16s gene using Sanger sequencing. After these  
522 checks, 2 x 150 NextSeq500 Shotgun Libraries were prepared from each sample using an  
523 Illumina TruSeq® Nano DNA Library Prep Kit (Illumina Inc, CA, USA). The quality of each  
524 library was checked using the Agilent 4200 Tape Station (Agilent Technologies, CA, USA).  
525 The libraries were then loaded onto NextSeq500 (Illumina Inc, CA, USA) for cluster generation



526 and paired-end sequencing. Trimmomatic (v0.38) was used to remove adapter sequences,  
527 ambiguous reads (with unknown nucleotides > 5%) and low-quality sequences (reads with >  
528 10% quality threshold < 20 phred score). After trimming, a minimum length of 100nt was  
529 applied. The mean coverage across the sequenced populations was ~100-fold at a quality score  
530 of 20.

531 We subjected these trimmed high quality sequences to the BRESEQ pipeline (Deatherage &  
532 Barrick 2014) (v0.33.2) to identify mutations enriched during our evolution experiment. We  
533 initially compared the ancestral sequence to the reference *E. coli* MG1655 genome to identify  
534 differences relative to the latter expected to be found in all the six evolved populations. Next,  
535 we adjusted for these differences by using the ancestral sequences as the reference for  
536 identifying mutational frequencies in each of the six descendant populations using the  
537 ‘polymorphic’ mode in BRESEQ. To avoid false positives and to restrict our analysis to  
538 mutations that must have been instrumental in shaping the average fitness of the population,  
539 we ignored mutations with frequencies < 10%.

540

## 541 **Acknowledgements**

542 We thank S. Selveshwari for help with NGS analysis and Milind Watve and M.S.  
543 Madhusudhan for their valuable inputs. YDC was supported by a Senior Research Fellowship  
544 initially sponsored by IISER Pune and then by Council for Scientific and Industrial Research  
545 (CSIR), Govt. of India. YDC also acknowledges Department of Biotechnology, Govt. of India  
546 for postdoctoral funding for this work. SM was supported by an INSPIRE undergraduate  
547 fellowship, sponsored by Department of Science and Technology (DST), Govt. of India. This  
548 project was supported by an external grant (BT/PR22328/BRB/10/1569/2016) from  
549 Department of Biotechnology, Govt. of India, and internal funding from IISER Pune.

550

## 551 **Conflict of interest**

552 The authors declare that they have no conflict of interest.

553

## 554 **Data archiving**

555 All the data relevant to this study will be uploaded on the Dryad digital repository upon  
556 acceptance.

## 557 **References**

558 Abdi, H. (2010). Holm's sequential Bonferroni procedure. *Encycl. Res. Des.*, 1–8.

559 Agrawal, A.A., Conner, J.K. & Rasmann, S. (2010). Tradeoffs and negative correlations in  
560 evolutionary ecology. *Evol. Darwin First*, 150, 243–268.

561 Ågren, J., Oakley, C.G., McKay, J.K., Lovell, J.T. & Schemske, D.W. (2013). Genetic  
562 mapping of adaptation reveals fitness tradeoffs in *Arabidopsis thaliana*. *Proc. Natl.*  
563 *Acad. Sci.*, 110, 21077–21082.

564 Anderson, J.T., Lee, C.-R., Rushworth, C.A., Colautti, R.I. & Mitchell-Olds, T. (2013).  
565 Genetic trade-offs and conditional neutrality contribute to local adaptation. *Mol.*  
566 *Ecol.*, 22, 699–708.

567 Andersson, D.I. & Hughes, D. (2010). Antibiotic resistance and its cost: is it possible to  
568 reverse resistance? *Nat. Rev. Microbiol.*, 8, 260–271.

569 Bailey, S.F., Rodrigue, N. & Kassen, R. (2015). The Effect of Selection Environment on the  
570 Probability of Parallel Evolution. *Mol. Biol. Evol.*, 32, 1436–1448.

571 Baquero, F., Negri, M.-C., Morosini, M.-I. & Blázquez, J. (1998). Antibiotic-Selective  
572 Environments. *Clin. Infect. Dis.*, 27, S5–S11.

- 573 Bedhomme, S., Lafforgue, G. & Elena, S.F. (2012). Multihost Experimental Evolution of a  
574 Plant RNA Virus Reveals Local Adaptation and Host-Specific Mutations. *Mol. Biol.*  
575 *Evol.*, 29, 1481–1492.
- 576 Bono, L.M., Smith, L.B., Pfennig, D.W. & Burch, C.L. (2017). The emergence of  
577 performance trade-offs during local adaptation: insights from experimental evolution.  
578 *Mol. Ecol.*, 26, 1720–1733.
- 579 Cantón, R., Horcajada, J.P., Oliver, A., Garbajosa, P.R. & Vila, J. (2013). Inappropriate use  
580 of antibiotics in hospitals: The complex relationship between antibiotic use and  
581 antimicrobial resistance. *Enfermedades Infecc. Microbiol. Clínica*, 31, Supplement 4,  
582 3–11.
- 583 Chavhan, Y., Karve, S. & Dey, S. (2019a). Adapting in larger numbers can increase the  
584 vulnerability of *Escherichia coli* populations to environmental changes. *Evolution*, 73,  
585 836–846.
- 586 Chavhan, Y., Malusare, S. & Dey, S. (2020). Larger bacterial populations evolve heavier  
587 fitness trade-offs and undergo greater ecological specialization. *Heredity*, 1–11.
- 588 Chavhan, Y.D., Ali, S.I. & Dey, S. (2019b). Larger Numbers Can Impede Adaptation in  
589 Asexual Populations despite Entailing Greater Genetic Variation. *Evol. Biol.*, 46, 1–  
590 13.
- 591 Cohan, F.M., King, E.C. & Zawadzki, P. (1994). Amelioration of the Deleterious Pleiotropic  
592 Effects of an Adaptive Mutation in *Bacillus Subtilis*. *Evolution*, 48, 81–95.
- 593 Cooper, V.S. (2014). The Origins of Specialization: Insights from Bacteria Held 25 Years in  
594 Captivity. *PLOS Biol.*, 12, e1001790.
- 595 Cooper, V.S. (2018). Experimental Evolution as a High-Throughput Screen for Genetic  
596 Adaptations. *mSphere*, 3, e00121–18.

- 597 Cooper, V.S., Bennett, A.F. & Lenski, R.E. (2001). Evolution of Thermal Dependence of  
598 Growth Rate of Escherichia Coli Populations During 20,000 Generations in a  
599 Constant Environment. *Evolution*, 55, 889–896.
- 600 Cooper, V.S. & Lenski, R.E. (2000). The population genetics of ecological specialization in  
601 evolving Escherichia coli populations. *Nature*, 407, 736–739.
- 602 Copin, R., Wang, X., Louie, E., Escuyer, V., Coscolla, M., Gagneux, S., *et al.* (2016). Within  
603 Host Evolution Selects for a Dominant Genotype of Mycobacterium tuberculosis  
604 while T Cells Increase Pathogen Genetic Diversity. *PLOS Pathog.*, 12, e1006111.
- 605 Coustau, C., Chevillon, C. & ffrench-Constant, R. (2000). Resistance to xenobiotics and  
606 parasites: can we count the cost? *Trends Ecol. Evol.*, 15, 378–383.
- 607 Cvijović, I., Good, B.H., Jerison, E.R. & Desai, M.M. (2015). Fate of a mutation in a  
608 fluctuating environment. *Proc. Natl. Acad. Sci.*, 112, E5021–E5028.
- 609 Deatherage, D.E. & Barrick, J.E. (2014). Identification of Mutations in Laboratory-Evolved  
610 Microbes from Next-Generation Sequencing Data Using *breseq*. In: *Engineering and Analyzing Multicellular*  
611 *Systems*. Humana Press, New York, NY, pp. 165–188.
- 612
- 613 Desai, M.M. & Fisher, D.S. (2007a). Beneficial Mutation–Selection Balance and the Effect  
614 of Linkage on Positive Selection. *Genetics*, 176, 1759–1798.
- 615 Desai, M.M. & Fisher, D.S. (2007b). Beneficial mutation–selection balance and the effect of  
616 linkage on positive selection. *Genetics*, 176, 1759–1798.
- 617 Desai, M.M., Fisher, D.S. & Murray, A.W. (2007). The Speed of Evolution and Maintenance  
618 of Variation in Asexual Populations. *Curr. Biol.*, 17, 385–394.
- 619 El Qaidi, S., Allemand, F., Oberto, J. & Plumbridge, J. (2009). Repression of galP, the  
620 galactose transporter in Escherichia coli, requires the specific regulator of N-  
621 acetylglucosamine metabolism. *Mol. Microbiol.*, 71, 146–157.

- 622 Ensminger, A.W., Yassin, Y., Miron, A. & Isberg, R.R. (2012). Experimental Evolution of  
623 *Legionella pneumophila* in Mouse Macrophages Leads to Strains with Altered  
624 Determinants of Environmental Survival. *PLOS Pathog.*, 8, e1002731.
- 625 Fisher, R.A. (1930). *The Genetical Theory Of Natural Selection*. At The Clarendon Press.
- 626 Friman, V.-P. & Buckling, A. (2013). Effects of predation on real-time host–parasite  
627 coevolutionary dynamics. *Ecol. Lett.*, 16, 39–46.
- 628 Fry, J.D. (1996). The Evolution of Host Specialization: Are Trade-Offs Overrated? *Am. Nat.*,  
629 148, S84–S107.
- 630 Futuyma, D.J. & Moreno, G. (1988). The Evolution of Ecological Specialization. *Annu. Rev.*  
631 *Ecol. Syst.*, 19, 207–233.
- 632 Gama-Castro, S., Salgado, H., Santos-Zavaleta, A., Ledezma-Tejeida, D., Muñoz-Rascado,  
633 L., García-Sotelo, J.S., *et al.* (2016). RegulonDB version 9.0: high-level integration of  
634 gene regulation, coexpression, motif clustering and beyond. *Nucleic Acids Res.*, 44,  
635 D133–D143.
- 636 Good, B.H., Rouzine, I.M., Balick, D.J., Hallatschek, O. & Desai, M.M. (2012). Distribution  
637 of fixed beneficial mutations and the rate of adaptation in asexual populations. *Proc.*  
638 *Natl. Acad. Sci. U. S. A.*, 109, 4950–4955.
- 639 Green, J. & Bohannan, B.J.M. (2006). Spatial scaling of microbial biodiversity. *Trends Ecol.*  
640 *Evol.*, 21, 501–507.
- 641 Hall, A.R. & Colegrave, N. (2008). Decay of unused characters by selection and drift. *J.*  
642 *Evol. Biol.*, 21, 610–617.
- 643 Hammer-Jespersen, K. & Munch-Petersen, A. (1975). Multiple regulation of nucleoside  
644 catabolizing enzymes: Regulation of the *deo*  
645 operon by the *cytR* and

- 646           Type="Italic">deoR</Emphasis> gene products. *Mol. Gen. Genet. MGG*, 137, 327–  
647           335.
- 648 Holt, R.D. (1996). Demographic constraints in evolution: Towards unifying the evolutionary  
649           theories of senescence and niche conservatism. *Evol. Ecol.*, 10, 1–11.
- 650 Jasmin, J.-N. & Kassen, R. (2007a). Evolution of a single niche specialist in variable  
651           environments. *Proc. R. Soc. Lond. B Biol. Sci.*, 274, 2761–2767.
- 652 Jasmin, J.-N. & Kassen, R. (2007b). On the experimental evolution of specialization and  
653           diversity in heterogeneous environments. *Ecol. Lett.*, 10, 272–281.
- 654 Jasmin, J.-N. & Zeyl, C. (2013). Evolution of pleiotropic costs in experimental populations.  
655           *J. Evol. Biol.*, 26, 1363–1369.
- 656 Joshi, A. & Thompson, J.N. (1995). Trade-offs and the evolution of host specialization. *Evol.*  
657           *Ecol.*, 9, 82–92.
- 658 Karve, S.M., Daniel, S., Chavhan, Y.D., Anand, A., Kharola, S.S. & Dey, S. (2015).  
659           Escherichia coli populations in unpredictably fluctuating environments evolve to face  
660           novel stresses through enhanced efflux activity. *J. Evol. Biol.*, 28, 1131–1143.
- 661 Kassen, R. (2002). The experimental evolution of specialists, generalists, and the  
662           maintenance of diversity. *J. Evol. Biol.*, 15, 173–190.
- 663 Kassen, R. (2014). *Experimental evolution and the nature of biodiversity*. Roberts.
- 664 Kassen, R. & Bell, G. (1998). Experimental evolution in Chlamydomonas. IV. Selection in  
665           environments that vary through time at different scales. *Heredity*, 80, 732–741.
- 666 Ketcham, A. (2019). Exploring Thymineless Death Using Systems Biology and Laboratory  
667           Evolution.
- 668 Ketola, T. & Saarinen, K. (2015). Experimental evolution in fluctuating environments:  
669           tolerance measurements at constant temperatures incorrectly predict the ability to  
670           tolerate fluctuating temperatures. *J. Evol. Biol.*, 28, 800–806.

- 671 Kubinak, J.L. & Potts, W.K. (2013). Host resistance influences patterns of experimental viral  
672 adaptation and virulence evolution. *Virulence*, 4, 410–418.
- 673 Lande, R. (1983). The response to selection on major and minor mutations affecting a  
674 metrical trait. *Heredity*, 50, 47–65.
- 675 Lang, G.I., Rice, D.P., Hickman, M.J., Sodergren, E., Weinstock, G.M., Botstein, D., *et al.*  
676 (2013). Pervasive genetic hitchhiking and clonal interference in forty evolving yeast  
677 populations. *Nature*, 500, 571–574.
- 678 Leiby, N. & Marx, C.J. (2014). Metabolic Erosion Primarily Through Mutation  
679 Accumulation, and Not Tradeoffs, Drives Limited Evolution of Substrate Specificity  
680 in *Escherichia coli*. *PLoS Biol*, 12, e1001789.
- 681 Levins, R. (1968). *Evolution in changing environments: some theoretical explorations*.  
682 Princeton University Press.
- 683 Li, Y., Petrov, D.A. & Sherlock, G. (2019). Single Nucleotide Mapping of Trait Space  
684 Reveals Pareto Fronts that Constrain Adaptation. *Nat. Ecol. Evol.*, 3, 1539–1551.
- 685 McDonald, M.J., Rice, D.P. & Desai, M.M. (2016). Sex speeds adaptation by altering the  
686 dynamics of molecular evolution. *Nature*, 531, 233–236.
- 687 Milliken, G.A. & Johnson, D.E. (2009). *Analysis of messy data, volume I: Designed*  
688 *Experiments*. Chapman and Hall/CRC.
- 689 Muscarella, M.E., Boot, C.M., Broeckling, C.D. & Lennon, J.T. (2019). Resource  
690 heterogeneity structures aquatic bacterial communities. *ISME J.*, 1.
- 691 Nilsson, A.I., Kugelberg, E., Berg, O.G. & Andersson, D.I. (2004). Experimental Adaptation  
692 of *Salmonella typhimurium* to Mice. *Genetics*, 168, 1119–1130.
- 693 Orr, H.A. (2007). Absolute Fitness, Relative Fitness, and Utility. *Evolution*, 61, 2997–3000.
- 694 Orr, H.A. & Coyne, J.A. (1992). The Genetics of Adaptation: A Reassessment. *Am. Nat.*,  
695 140, 725–742.

- 696 Otto. (2004). Two steps forward, one step back: the pleiotropic effects of favoured alleles.  
697 *Proc. R. Soc. Lond. B Biol. Sci.*, 271, 705–714.
- 698 Philippe, N., Pelosi, L., Lenski, R.E. & Schneider, D. (2009). Evolution of Penicillin-Binding  
699 Protein 2 Concentration and Cell Shape during a Long-Term Experiment with  
700 *Escherichia coli*. *J. Bacteriol.*, 191, 909–921.
- 701 Presloid, J.B., Ebendick-Corpus, B.E., Zárate, S. & Novella, I.S. (2008). Antagonistic  
702 Pleiotropy Involving Promoter Sequences in a Virus. *J. Mol. Biol.*, 382, 342–352.
- 703 Rausher, M.D. (1984). Tradeoffs in Performance on Different Hosts: Evidence from Within-  
704 and Between-Site Variation in the Beetle *Deloyala guttata*. *Evolution*, 38, 582–595.
- 705 Remold, S. (2012). Understanding specialism when the jack of all trades can be the master of  
706 all. *Proc. R. Soc. Lond. B Biol. Sci.*, rspb20121990.
- 707 Rose, M. & Charlesworth, B. (1980). A test of evolutionary theories of senescence. *Nature*,  
708 287, 141–142.
- 709 Sane, M., Miranda, J.J. & Agashe, D. (2018). Antagonistic pleiotropy for carbon use is rare in  
710 new mutations. *Evolution*, 72, 2202–2213.
- 711 Satterwhite, R.S. & Cooper, T.F. (2015). Constraints on adaptation of *Escherichia coli* to  
712 mixed-resource environments increase over time. *Evolution*, 69, 2067–2078.
- 713 Schick, A., Bailey, S.F. & Kassen, R. (2015). Evolution of Fitness Trade-Offs in Locally  
714 Adapted Populations of *Pseudomonas fluorescens*. *Am. Nat.*, 186, S48–S59.
- 715 Shimada, T., Kori, A. & Ishihama, A. (2013). Involvement of the ribose operon repressor  
716 RbsR in regulation of purine nucleotide synthesis in *Escherichia coli*. *FEMS*  
717 *Microbiol. Lett.*, 344, 159–165.
- 718 Sniegowski, P.D. & Gerrish, P.J. (2010). Beneficial mutations and the dynamics of  
719 adaptation in asexual populations. *Philos. Trans. R. Soc. B Biol. Sci.*, 365, 1255–1263.



- 720 Soupene, E., Heeswijk, W.C. van, Plumbridge, J., Stewart, V., Bertenthal, D., Lee, H., *et al.*  
721 (2003). Physiological Studies of *Escherichia coli* Strain MG1655: Growth Defects  
722 and Apparent Cross-Regulation of Gene Expression. *J. Bacteriol.*, 185, 5611–5626.
- 723 Swings, T., Van, B. den B., Wuyts, S., Oeyen, E., Voordeckers, K., Verstrepen, K.J., *et al.*  
724 (2017). Adaptive tuning of mutation rates allows fast response to lethal stress in  
725 *Escherichia coli*. Adaptive tuning of mutation rates allows fast response to lethal  
726 stress in *Escherichia coli*. *ELife* *ELife*, 6, 6.
- 727 Tenaillon, O., Skurnik, D., Picard, B. & Denamur, E. (2010). The population genetics of  
728 commensal *Escherichia coli*. *Nat. Rev. Microbiol.*, 8, 207–217.
- 729 Torsvik, V., Øvreås, L. & Thingstad, T.F. (2002). Prokaryotic Diversity--Magnitude,  
730 Dynamics, and Controlling Factors. *Science*, 296, 1064–1066.
- 731 Valentin-Hansen, P., Søgaard-Andersen, L. & Pedersen, H. (1996). A flexible partnership:  
732 the CytR anti-activator and the cAMP-CRP activator protein, comrades in  
733 transcription control. *Mol. Microbiol.*, 20, 461–466.
- 734 Vasilakis, N., Deardorff, E.R., Kenney, J.L., Rossi, S.L., Hanley, K.A. & Weaver, S.C.  
735 (2009). Mosquitoes Put the Brake on Arbovirus Evolution: Experimental Evolution  
736 Reveals Slower Mutation Accumulation in Mosquito Than Vertebrate Cells. *PLOS*  
737 *Pathog.*, 5, e1000467.
- 738 Velicer, G.J. & Lenski, R.E. (1999). Evolutionary Trade-Offs Under Conditions of Resource  
739 Abundance and Scarcity: Experiments with Bacteria. *Ecology*, 80, 1168–1179.
- 740 Vila-Aiub, M.M., Neve, P. & Powles, S.B. (2009). Fitness costs associated with evolved  
741 herbicide resistance alleles in plants. *New Phytol.*, 184, 751–767.
- 742 Vogwill, T. & MacLean, R.C. (2015). The genetic basis of the fitness costs of antimicrobial  
743 resistance: a meta-analysis approach. *Evol. Appl.*, 8, 284–295.

- 744 Wallenstein, M.D. & Hall, E.K. (2012). A trait-based framework for predicting when and  
745 where microbial adaptation to climate change will affect ecosystem functioning.  
746 *Biogeochemistry*, 109, 35–47.
- 747 Whitlock, M.C. (1996). The Red Queen Beats the Jack-Of-All-Trades: The Limitations on  
748 the Evolution of Phenotypic Plasticity and Niche Breadth. *Am. Nat.*, 148, S65–S77.
- 749 Wytock, T.P., Fiebig, A., Willett, J.W., Herrou, J., Fergin, A., Motter, A.E., *et al.* (2018).  
750 Experimental evolution of diverse *Escherichia coli* metabolic mutants identifies  
751 genetic loci for convergent adaptation of growth rate. *PLoS Genet.*, 14.

752

## Supplementary Information

753

754 **An interplay of population size and environmental heterogeneity**  
755 **explains why fitness costs are rare**

756

757 Yashraj Chavhan<sup>1</sup>, Sarthak Malusare<sup>1</sup>, and Sutirth Dey<sup>1, \*</sup>

758 <sup>1</sup> Indian Institute of Science Education and Research (IISER) Pune, Dr Homi Bhabha Road,  
759 Pashan, Pune, Maharashtra, 411008, India.

760 \*Corresponding author: Sutirth Dey, Biology Division, Indian Institute of Science-Education  
761 and Research Pune, Dr Homi Bhabha Road, Pune, Maharashtra 411 008, India.

**Table S1.** The absence of costs in experimental evolution studies with asexual microbes

| Reference no. | Model system                     | Absence of costs |
|---------------|----------------------------------|------------------|
| 1             | Bacteriophage $\phi 6$           | uniform          |
| 2             | Bacteriophage $\phi 6$           | nonuniform       |
| 3             | Bacteriophage $\phi 6$           | nonuniform       |
| 4             | Bacteriophage $\phi 6$           | nonuniform       |
| 5             | Bacteriophage $\phi 6$           | nonuniform       |
| 6             | Bacteriophage ID8 and NC28       | uniform          |
| 7             | <i>Burkholderia</i> sp.          | nonuniform       |
| 8             | <i>Chlamydomonas reinhardtii</i> | uniform          |
| 9             | Cucumber mosaic virus            | uniform          |
| 10            | Dengue virus                     | uniform          |
| 11            | <i>Escherichia coli</i>          | uniform          |
| 12            | <i>Escherichia coli</i>          | nonuniform       |
| 13            | <i>Escherichia coli</i>          | nonuniform       |
| 14            | <i>Escherichia coli</i>          | nonuniform       |
| 15            | <i>Escherichia coli</i>          | nonuniform       |
| 16            | <i>Escherichia coli</i>          | nonuniform       |
| 17            | <i>Escherichia coli</i>          | nonuniform       |
| 18            | <i>Holospira undulata</i>        | nonuniform       |
| 19            | <i>Pseudomonas aeruginosa</i>    | nonuniform       |
| 20            | <i>Pseudomonas fluorescens</i>   | uniform          |
| 21            | <i>Pseudomonas fluorescens</i>   | uniform          |
| 22            | <i>Pseudomonas fluorescens</i>   | nonuniform       |
| 23            | <i>Pseudomonas fluorescens</i>   | nonuniform       |
| 24            | <i>Pseudomonas fluorescens</i>   | nonuniform       |
| 25            | <i>Saccharomyces cerevisiae</i>  | nonuniform       |
| 26            | <i>Saccharomyces cerevisiae</i>  | nonuniform       |
| 27            | <i>Saccharomyces cerevisiae</i>  | nonuniform       |
| 28            | <i>Saccharomyces cerevisiae</i>  | nonuniform       |
| 29            | <i>Serratia marcescens</i>       | nonuniform       |

762 **Supplementary text**

763 **ST.1. Details of the studies shown in Fig. 1a:**

764 Fig. 1a incorporates those bacterial experimental evolution studies on fitness costs in  
765 heterogeneous environments for which estimates of harmonic mean population size could be  
766 obtained. Studies conducted with viruses, and eukaryotes are not included here.

767 Key in the legend of Fig. 1a:

768 A: Ref. 29<sup>\*</sup>; B: Ref. 24; C: Ref. 19; D: Ref. 23; E: Ref. 15; F: Ref. 11; G: Ref. 22; H: Ref. 20;  
769 I: Ref. 17<sup>‡</sup>

770 <sup>\*</sup>The population size reported for Study A (Ref. 29) has been calculated indirectly using the  
771 stationary phase densities reported for a different bacterial species in the selection medium in  
772 question and is likely an overestimate.

773 <sup>‡</sup>The data for population size have been provided by the authors of Study I (Ref. 17).

## 774 **Supplementary Methods**

### 775 **SM.1. Details of the ancestral strain and nutrient media:**

776 **Ancestral strain:** *Escherichia coli* MG1655 lacY::kan. The ancestral strain was resistant to  
777 kanamycin.

778

779 **Nutrient media:** There was one heterogeneous and four homogeneous environments in our  
780 evolution experiment. Each homogeneous environment comprised of an M9-based minimal  
781 medium, 1 litre of which contained the following:

- 782 • 12.8 g Na<sub>2</sub>HPO<sub>4</sub>·7H<sub>2</sub>O
- 783 • 3.0 g KH<sub>2</sub>PO<sub>4</sub>
- 784 • 0.5 g NaCl
- 785 • 1.0 g NH<sub>4</sub>Cl
- 786 • 240.6 mg MgSO<sub>4</sub>
- 787 • 11.1 mg CaCl<sub>2</sub>
- 788 • 4g of the pre-decided sole carbon source
- 789 • 50 mg Kanamycin sulphate

790 The four homogeneous environments differed in terms of the identity of the pre-decided sole  
791 carbon source. The following four carbon sources were used in our experiment:

- 792 • Thymidine
- 793 • Galactose
- 794 • Maltose
- 795 • Sorbitol

796 The heterogeneous environment fluctuated randomly between the above four carbon sources  
797 every 13.3 generations.

798 **SM.2. Analysis of differences in geometric mean fitness in our experimental regimens:**

799 We computed the geometric mean fitness across each of the four carbon sources (G, M, S, and  
800 T) for all the ten evolutionary regimens in our experiment (comprising sixty independently  
801 evolving populations in total).

802 We used a mixed model ANOVA to compare the geometric mean fitness across the populations  
803 evolved in the heterogeneous environment (FL and FS). In this analysis, we considered the  
804 population size (two levels: large (L) and small (S)) as the fixed factor and the day of assay as  
805 the random factor, with each day corresponding to one biological replicate in our randomized  
806 complete block design (RCBD (see the Main text for details)). We also determined the effect  
807 size of the difference between FL and FS using partial  $\eta^2$ , interpreting the latter as showing  
808 small, medium, or large effect for Partial  $\eta^2 < 0.06$ ,  $0.06 < \text{Partial } \eta^2 < 0.14$ ,  $0.14 < \text{Partial } \eta^2$   
809 respectively<sup>31</sup>.

810 We further tested if the treatment regimens evolved in the heterogeneous environment (FL /  
811 FS) had evolved significantly different geometric mean fitness (over T, G, M, and S) as  
812 compared to the control regimens evolved in homogeneous environments. To this end, we  
813 conducted two mixed-model ANOVAs with evolutionary regimen (nine levels) as the fixed  
814 factor and day of assay (six levels) as the random factor. In the first ANOVA (Table S6), the  
815 nine levels in the evolutionary regimen (fixed factor) consisted of the eight homogeneous  
816 environments regimens and FL, while in the second ANOVA (Table S7), the fixed factor  
817 consisted of the same eight homogeneous environments and FS. For both ANOVAs, we used  
818 the Dunnett's procedure) to assess the pairwise differences of FL or FS with the eight  
819 homogeneous environment regimens.

820 In another (more conservative) analysis of the differences in GM fitness across regimens, we  
821 used a mixed model ANOVA with evolutionary regimen (ten levels: FL, FS and eight  
822 homogeneous environment regimens) as the fixed factor and day of assay (six levels) as the  
823 random factor. Subsequently, we compared all possible pairwise differences between the ten  
824 evolutionary regimens using Tukey's HSD (Table S8).

## Supplementary Results

**Table S2.** Analysis of adaptation and maladaptation events in all ten evolutionary regimens using single-sample t-tests ( $N = 6$ ) with reference to the ancestral fitness in each of the four carbon sources\* (scaled to 1).

| Selection environment | Population type | Assay environment | $P$ value              | Corrected $P$ value    | Inference     |
|-----------------------|-----------------|-------------------|------------------------|------------------------|---------------|
| Heterogeneous         | FL              | T                 | $1.58 \times 10^{-5}$  | $6.33 \times 10^{-5}$  | Adaptation    |
| Heterogeneous         | FL              | G                 | $7.025 \times 10^{-3}$ | 0.021                  | Adaptation    |
| Heterogeneous         | FL              | M                 | 0.564                  | -                      | No change     |
| Heterogeneous         | FL              | S                 | 0.612                  | -                      | No change     |
| Heterogeneous         | FS              | T                 | 0.049                  | 0.049                  | Adaptation    |
| Heterogeneous         | FS              | G                 | 0.025                  | 0.051                  | Maladaptation |
| Heterogeneous         | FS              | M                 | $2.5 \times 10^{-4}$   | 0.001                  | Maladaptation |
| Heterogeneous         | FS              | S                 | 0.009                  | 0.02635                | Maladaptation |
| Homogeneous T         | TL              | T                 | $8.1 \times 10^{-7}$   | $3.24 \times 10^{-6}$  | Adaptation    |
| Homogeneous T         | TL              | G                 | $8.94 \times 10^{-5}$  | $2.68 \times 10^{-4}$  | Maladaptation |
| Homogeneous T         | TL              | M                 | $5.53 \times 10^{-4}$  | $5.53 \times 10^{-4}$  | Maladaptation |
| Homogeneous T         | TL              | S                 | $1.13 \times 10^{-4}$  | $2.27 \times 10^{-4}$  | Maladaptation |
| Homogeneous T         | TS              | T                 | $1.83 \times 10^{-4}$  | $7.33 \times 10^{-4}$  | Adaptation    |
| Homogeneous T         | TS              | G                 | $6.839 \times 10^{-3}$ | $6.839 \times 10^{-3}$ | Maladaptation |
| Homogeneous T         | TS              | M                 | $4.58 \times 10^{-4}$  | $1.372 \times 10^{-3}$ | Maladaptation |
| Homogeneous T         | TS              | S                 | $6.19 \times 10^{-4}$  | $1.238 \times 10^{-3}$ | Maladaptation |
| Homogeneous G         | GL              | T                 | 0.003                  | 0.013                  | Maladaptation |
| Homogeneous G         | GL              | G                 | 0.016                  | 0.049                  | Adaptation    |
| Homogeneous G         | GL              | M                 | 0.633                  | 0.633                  | No change     |
| Homogeneous G         | GL              | S                 | 0.973                  | 0.973                  | No change     |
| Homogeneous G         | GS              | T                 | 0.122                  | 0.122                  | No change     |
| Homogeneous G         | GS              | G                 | 0.617                  | 0.617                  | No change     |



|               |    |   |       |       |           |
|---------------|----|---|-------|-------|-----------|
| Homogeneous G | GS | M | 0.483 | 0.483 | No change |
| Homogeneous G | GS | S | 0.016 | 0.061 | No change |

*continued...*

**Table S2 continued**

| Selection environment | Population type | Assay environment | <i>P</i> value        | Corrected <i>P</i> value | Inference     |
|-----------------------|-----------------|-------------------|-----------------------|--------------------------|---------------|
| Homogeneous M         | ML              | T                 | 0.252                 | -                        | No change     |
| Homogeneous M         | ML              | G                 | 0.036                 | 0.134661                 | No change     |
| Homogeneous M         | ML              | M                 | 0.090                 | -                        | No change     |
| Homogeneous M         | ML              | S                 | 0.762                 | -                        | No change     |
| Homogeneous M         | MS              | T                 | 0.134                 | -                        | No change     |
| Homogeneous M         | MS              | G                 | 0.164                 | -                        | No change     |
| Homogeneous M         | MS              | M                 | 0.066                 | -                        | No change     |
| Homogeneous M         | MS              | S                 | 0.069                 | -                        | No change     |
| Homogeneous S         | SL              | T                 | $3.14 \times 10^{-4}$ | $1.257 \times 10^{-3}$   | Maladaptation |
| Homogeneous S         | SL              | G                 | $7.59 \times 10^{-3}$ | 0.023                    | Maladaptation |
| Homogeneous S         | SL              | M                 | 0.088                 | -                        | No change     |
| Homogeneous S         | SL              | S                 | 0.690                 | -                        | No change     |
| Homogeneous S         | SS              | T                 | $5.5 \times 10^{-3}$  | 0.011                    | Maladaptation |
| Homogeneous S         | SS              | G                 | $6.4 \times 10^{-5}$  | $2.56 \times 10^{-4}$    | Maladaptation |
| Homogeneous S         | SS              | M                 | 0.001                 | 0.003                    | Maladaptation |
| Homogeneous S         | SS              | S                 | 0.366                 | -                        | No change     |

\*The data pertaining to evolution in T and G have been reported in a previous study<sup>32</sup>.

**Table S3.** The evolutionary emergence of costs of adaptation in populations evolved in the heterogeneous environment

| Case(s) which showed costs of adaptation |                                    | Case(s) which showed simultaneous adaptation |                                 |
|------------------------------------------|------------------------------------|----------------------------------------------|---------------------------------|
| Population size                          | Environmental pair(s)              | Population size                              | Environmental pair(s)           |
| Large                                    | None                               | Large                                        | T (adaptation) – G (adaptation) |
| Small                                    | T (adaptation) - G (maladaptation) | Small                                        | None                            |
|                                          | T (adaptation) - S (maladaptation) |                                              |                                 |
|                                          | T (adaptation) - M (maladaptation) |                                              |                                 |

**Table S4.** The evolutionary emergence of costs of adaptation in populations evolved in homogeneous environments

| Case(s) which showed costs of adaptation |                 |                                                                | Case(s) which showed simultaneous adaptation |
|------------------------------------------|-----------------|----------------------------------------------------------------|----------------------------------------------|
| Selection environment                    | Population size | Environmental pair(s)                                          |                                              |
| T                                        | Large           | T (adaptation) - G (maladaptation) <sup>†</sup>                | None                                         |
|                                          |                 | T (adaptation) - S (maladaptation) <sup>†</sup>                |                                              |
|                                          |                 | T (adaptation) - M (maladaptation) <sup>†</sup>                |                                              |
| T                                        | Small           | T (adaptation) - G (maladaptation)                             |                                              |
|                                          |                 | T (adaptation) - S (maladaptation)                             |                                              |
|                                          |                 | T (adaptation) - M (maladaptation)                             |                                              |
| G                                        | Large           | G (adaptation) - T (maladaptation)                             |                                              |
| G                                        | Small           | Not applicable<br>(no adaptation to the selection environment) |                                              |
| S                                        | Large           |                                                                |                                              |
| S                                        | Small           |                                                                |                                              |

|   |       |  |  |
|---|-------|--|--|
| M | Large |  |  |
| M | Small |  |  |

†Across the T - M, T - G, and T - S pairs, the costs suffered by the large (TL) populations were greater than those suffered by the small (TS) populations<sup>32</sup>.

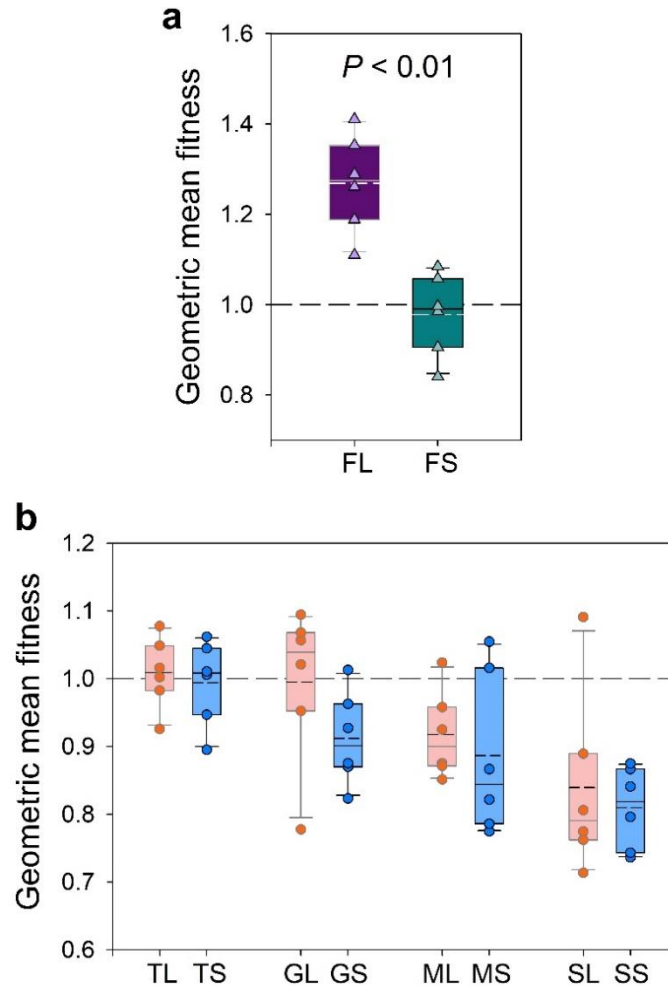

825

826 **Fig. S1. Changes in geometric mean fitness of our experimental populations across T, G,**  
827 **M, and S.** The solid lines in the box plots mark the 25<sup>th</sup>, 50<sup>th</sup>, and 75<sup>th</sup> percentiles while the  
828 whiskers mark the 10<sup>th</sup> and 90<sup>th</sup> percentiles; the short-dashed lines within the box plots  
829 represent means (N = 6). The long-dashed line outside the box plots represent the ancestral  
830 level of the ordinate. **(a)** Geometric mean fitness of populations evolved in the heterogeneous  
831 environment. FL > FS ( $P < 0.01$ ). **(b)** Geometric mean fitness of populations evolved in  
832 homogeneous environments. See Tables S5 and S6 for details.

833 We found that FL populations had significantly higher geometric mean fitness than FS (Fig.

834 5a; Table S4; mixed-model ANOVA:  $F_{1,5} = 18.002$ ;  $P = 0.008$ ; partial  $\eta^2 = 0.783$  (large effect)).

835 Thus, the large (FL) populations adapted better than the small (FS) populations to their

836 common heterogeneous environment. This result is expected from the absence of any fitness  
837 costs in FL and the presence of such costs across the maximum possible number of  
838 environmental pairs under consideration in FS. We further found that FL could significantly  
839 enhance their geometric mean fitness with respect to the common ancestor, but FS failed to do  
840 so (Fig. S1a; Table S5). Curiously, despite showing significant fitness changes in T  
841 (adaptation) and G (maladaptation), FS did not have significantly different geometric mean  
842 fitness as compared to the common ancestor (Fig. S1a; Table S5). Adaptation to homogeneous  
843 environments is not expected to entail increased geometric mean fitness over multiple  
844 (unencountered) environments. Indeed, we found that the geometric mean fitness over the four  
845 carbon sources did not increase significantly as compared to the ancestral level in any of the  
846 homogeneous environment regimens, regardless of the population size (Fig. S1b; Table S5).

847 We also found that FL had a much larger geometric mean fitness than all the homogeneous  
848 environment regimens (Table S6). However, FS did not have significantly different geometric  
849 mean fitness as compared to a vast majority (seven out of the eight) of homogeneous  
850 environment regimens (Table S7). A similar pattern was revealed by a more conservative post  
851 hoc analysis using Tukey's HSD (Table S8).

852 Both the above analyses (using Dunnett's or Tukey's post-hoc tests) sought to answer the same  
853 question: whether the FL / FS regimens significantly differed in their GM fitness as compared  
854 to the homogeneous environment regimens. Comparing Tables S6-S7 with S8, we find that the  
855 pair-wise differences that turn up as statistically significant are identical between the two  
856 analyses (except one case: FS and SL show up as significantly different in Dunnett's test but  
857 not in Tukey's HSD). This is not surprising, as the analysis with two Dunnett's procedures  
858 comprises of (and therefore corrects for) only 18 pair-wise tests, while the corresponding  
859 analysis with Tukey's HSD corrects for 81 pair-wise tests (of which only 18 are relevant for  
860 our purpose). Therefore, the second analysis has a lot less power than the first one. The fact

861 that the results remain virtually identical across both cases highlights the robustness of the  
862 same. It should be noted here that our interpretation of the difference between FL and FS  
863 remains agnostic to the choice of analysis.

864 Taken together, FL adapted significantly to the heterogeneous (fluctuating) environment, but  
865 FS failed to do so. Importantly, the preparedness of FS to face the environmental fluctuations  
866 across G, M, S and T was similar to most homogeneous environment regimens.

867

**Table S5.** Summary of single-sample t-tests ( $N = 6$ ) of differences in the geometric mean fitness (calculated over G, M, S, and T) of the ten evolutionary regimens with the corresponding ancestral value ( $= 1$ )

| Selection environment | Population type | <i>P</i> value        | Inference   |
|-----------------------|-----------------|-----------------------|-------------|
| Heterogeneous         | FL              | 0.002                 | GM enhanced |
| Heterogeneous         | FS              | 0.584                 | No change   |
| Homogeneous           | TL              | 0.703                 | No change   |
| Homogeneous           | TS              | 0.826                 | No change   |
| Homogeneous           | GL              | 0.922                 | No change   |
| Homogeneous           | GS              | 0.026                 | GM reduced  |
| Homogeneous           | ML              | 0.027                 | GM reduced  |
| Homogeneous           | MS              | 0.069                 | No change   |
| Homogeneous           | SL              | 0.034                 | GM reduced  |
| Homogeneous           | SS              | $5.96 \times 10^{-4}$ | GM reduced  |

868

869

**Table S6.** Summary of Dunnett post-hoc tests ( $N = 6$ ) with respect to FL done after analysing the geometric mean fitness differences across nine evolutionary regimens (FL and eight homogeneous environment regimens) using a mixed model ANOVA, which revealed a significant main effect of the identity of the evolutionary regimen:  $F_{8,40} = 16.284$ ,  $P = 2.172 \times 10^{-10}$

| Population type | <i>P</i> value (Dunnett (reference: FL)) |
|-----------------|------------------------------------------|
| GL              | 0.000016                                 |
| GS              | 0.000009                                 |
| TL              | 0.000028                                 |
| TS              | 0.000016                                 |
| ML              | 0.000009                                 |

|    |          |
|----|----------|
| MS | 0.000009 |
| SL | 0.000009 |
| SS | 0.000009 |

870

871

872

**Table S7.** Summary of Dunnett post-hoc tests ( $N = 6$ ) with respect to FS done after analysing the geometric mean fitness differences across nine evolutionary regimens (FS and eight homogeneous environment regimens) using a mixed model ANOVA, which revealed a significant main effect of the identity of the evolutionary regimen:  $F_{8,40} = 5.094$ ,  $P = 2.074 \times 10^{-4}$

| Population type | <i>P</i> value (Dunnett (reference: FS)) |
|-----------------|------------------------------------------|
| GL              | 0.999771                                 |
| GS              | 0.577267                                 |
| TL              | 0.984290                                 |
| TS              | 0.999855                                 |
| ML              | 0.666052                                 |
| MS              | 0.243947                                 |
| SL              | 0.024777                                 |
| SS              | 0.004229                                 |

873

874

875

**Table S8.** Summary of Tukey post-hoc tests ( $N = 6$ ) done after analysing the geometric mean fitness differences across all the ten evolutionary regimens using a mixed model ANOVA, which revealed a significant main effect of the identity of the evolutionary regimen:  $F_{9,45} = 14.566$ ,  $P = 1.129 \times 10^{-10}$ . Tukey *P* values for pairwise differences with only FL and FS are shown below:

|    | GL       | GS       | TL       | TS       | ML       | MS       | SL       | SS       | FL       | FS       |
|----|----------|----------|----------|----------|----------|----------|----------|----------|----------|----------|
| FL | 0.000177 | 0.000156 | 0.000216 | 0.000175 | 0.000156 | 0.000156 | 0.000156 | 0.000156 | -        | 0.000161 |
| FS | 0.999998 | 0.921270 | 0.999688 | 0.999999 | 0.952902 | 0.647098 | 0.126786 | 0.027274 | 0.000161 | -        |

876

**Table S9.** Details of mutations observed at frequencies  $\geq 10\%$  after  $\sim 480$  generations of evolution

| Population | Position  | Mutation          | Frequency | Annotation                    | Locus/Region                            | Region description                                                                            | Putative link to adaptation |
|------------|-----------|-------------------|-----------|-------------------------------|-----------------------------------------|-----------------------------------------------------------------------------------------------|-----------------------------|
| FL(A)      | 19,09,523 | IS2 (+) +5 bp     | 100%      | intergenic (-22/+644)         | yobF $\leftarrow$ / $\leftarrow$ yebO   | DUF2527 domain-containing protein YobF / uncharacterized protein YebO                         | -                           |
| FL(A)      | 30,89,333 | C $\rightarrow$ A | 100%      | intergenic (+341/-83)         | metK $\rightarrow$ / $\rightarrow$ galP | methionine adenosyltransferase / galactose:H(+) symporter                                     | Galactose uptake            |
| FL(A)      | 39,67,800 | G $\rightarrow$ T | 100%      | S84I (AGC $\rightarrow$ ATC)  | rho $\rightarrow$                       | transcription termination factor Rho                                                          | -                           |
| FL(A)      | 41,25,478 | G $\rightarrow$ A | 100%      | Q38* (CAG $\rightarrow$ TAG)  | cytR $\leftarrow$                       | DNA-binding transcriptional repressor CytR                                                    | Thymidine metabolism        |
| FL(A)      | 10,04,716 | A $\rightarrow$ C | 12.80%    | T66P (ACG $\rightarrow$ CCG)  | ycbF $\rightarrow$                      | putative fimbrial chaperone YcbF                                                              | -                           |
| FL(A)      | 17,10,904 | A $\rightarrow$ C | 11.60%    | A692A (GCA $\rightarrow$ GCC) | rsxC $\rightarrow$                      | SoxR [2Fe-2S] reducing system protein RsxC                                                    | -                           |
| FL(B)      | 7,02,169  | A $\rightarrow$ C | 100%      | intergenic (-1/+8)            | nagC $\leftarrow$ / $\leftarrow$ nagA   | DNA-binding transcriptional dual regulator NagC / N-acetylglucosamine-6-phosphate deacetylase | Galactose metabolism        |
| FL(B)      | 19,09,302 | IS5 (-) +4 bp     | 100%      | coding (41-44/210 nt)         | cspC $\leftarrow$                       | stress protein, member of the CspA family                                                     | -                           |
| FL(B)      | 41,24,957 | $\Delta 8$ bp     | 60.70%    | coding (626-633/1026 nt)      | cytR $\leftarrow$                       | DNA-binding transcriptional repressor CytR                                                    | Thymidine metabolism        |
| FL(B)      | 38,16,992 | $\Delta 82$ bp    | 41.40%    |                               | [rph]                                   | [rph]                                                                                         | Thymidine metabolism        |
| FL(B)      | 41,25,100 | $\Delta 1$ bp     | 32.30%    | coding (490/1026 nt)          | cytR $\leftarrow$                       | DNA-binding transcriptional repressor CytR                                                    | Thymidine metabolism        |
| FL(B)      | 23,17,127 | IS2 (-) +5 bp     | 27.00%    | coding (2508-2512/2673 nt)    | rcsD $\rightarrow$                      | RcsD phosphotransferase                                                                       | Galactose metabolism        |
| FL(B)      | 35,54,248 | T $\rightarrow$ A | 22.20%    | V11D (GTT $\rightarrow$ GAT)  | malT $\rightarrow$                      | DNA-binding transcriptional activator MalT                                                    | Maltose metabolism          |
| FL(B)      | 16,70,246 | IS2 (-) +5 bp     | 17.40%    | coding (225-229/1221 nt)      | mhc $\leftarrow$                        | DNA-binding transcriptional repressor Mhc                                                     | -                           |
| FL(B)      | 17,10,904 | A $\rightarrow$ C | 16.20%    | A692A (GCA $\rightarrow$ GCC) | rsxC $\rightarrow$                      | SoxR [2Fe-2S] reducing system protein RsxC                                                    | -                           |
| FL(B)      | 19,17,415 | $\Delta 1$ bp     | 15.40%    | coding (30/699 nt)            | proQ $\leftarrow$                       | RNA chaperone ProQ                                                                            | -                           |
| FL(B)      | 19,17,411 | +TTTACTGCTAT      | 14.80%    | coding (34/699 nt)            | proQ $\leftarrow$                       | RNA chaperone ProQ                                                                            | -                           |

*continued...*

**Table S9 (continued)**

| Population | Position  | Mutation      | Frequency | Annotation               | Locus/Region    | Region description                                                                          | Putative link to adaptation |
|------------|-----------|---------------|-----------|--------------------------|-----------------|---------------------------------------------------------------------------------------------|-----------------------------|
| FL(B)      | 15,54,101 | C→A           | 14.40%    | intergenic (+200/+207)   | fdnI → / ← yddM | formate dehydrogenase N subunit gamma / putative DNA-binding transcriptional regulator YddM | -                           |
| FL(B)      | 12,55,907 | T→G           | 10.60%    | K652N (AAA→AAC)          | ycgV ←          | putative autotransporter adhesin YcgV                                                       | -                           |
| FL(D)      | 41,24,871 | A→G           | 68.50%    | L240P (CTT→CCT)          | cytR ←          | DNA-binding transcriptional repressor CytR                                                  | Thymidine metabolism        |
| FL(D)      | 20,86,018 | G→A           | 65.50%    | A214A (GCC→GCT)          | yeeE ←          | inner membrane protein YeeE                                                                 | -                           |
| FL(D)      | 36,59,405 | IS5 (-) +4 bp | 63.00%    | intergenic (-218/-91)    | arrS ← / → gadE | small regulatory RNA ArrS/DNA-binding transcriptional activator GadE                        | Thymidine metabolism        |
| FL(D)      | 7,02,933  | T→G           | 57.70%    | E131D (GAA→GAC)          | nagA ←          | N-acetylglucosamine-6-phosphate deacetylase                                                 | Galactose metabolism        |
| FL(D)      | 41,24,679 | C→T           | 30.90%    | G304D (GGT→GAT)          | cytR ←          | DNA-binding transcriptional repressor CytR                                                  | Thymidine metabolism        |
| FL(D)      | 39,67,875 | G→T           | 27.90%    | R109L (CGC→CTC) ‡        | rho →           | transcription termination factor Rho                                                        | -                           |
| FL(D)      | 39,67,876 | C→T           | 27.90%    | R109R (CGC→CGT) ‡        | rho →           | transcription termination factor Rho                                                        | -                           |
| FL(D)      | 30,14,614 | T→G           | 10.00%    | N253T (AAC→ACC)          | yqeB ←          | XdhC-CoxI family protein YqeB                                                               | -                           |
| FS(A)      | 39,39,901 | C→T           | 100%      | A181V (GCC→GTC)          | rbsR →          | DNA-binding transcriptional dual regulator RbsR                                             | Thymidine metabolism        |
| FS(A)      | 41,25,434 | Δ3 bp         | 100%      | coding (154-156/1026 nt) | cytR ←          | DNA-binding transcriptional repressor CytR                                                  | Thymidine metabolism        |
| FS(A)      | 23,77,019 | T→G           | 16.90%    | T26P (ACC→CCC)           | menC ←          | o-succinylbenzoate synthase                                                                 | -                           |
| FS(A)      | 17,10,565 | A→G           | 14.20%    | E579E (GAA→GAG)          | rsxC →          | SoxR [2Fe-2S] reducing system protein RsxC                                                  | -                           |
| FS(A)      | 17,10,904 | A→C           | 12.90%    | A692A (GCA→GCC)          | rsxC →          | SoxR [2Fe-2S] reducing system protein RsxC                                                  | -                           |
| FS(D)      | 41,24,694 | G→T           | 100%      | P299Q (CCG→CAG)          | cytR ←          | DNA-binding transcriptional repressor CytR                                                  | Thymidine metabolism        |
| FS(D)      | 41,87,795 | A→C           | 100%      | E438A (GAA→GCA)          | rpoC →          | RNA polymerase subunit beta'                                                                |                             |
| FS(D)      | 33,08,226 | T→G           | 18.70%    | N256T (AAC→ACC)          | deaD ←          | ATP-dependent RNA helicase DeaD                                                             |                             |
| FS(D)      | 20,83,798 | Δ1 bp         | 16.90%    | intergenic (-117/-92)    | dacD ← / → sbcB | D-alanyl-D-alanine carboxypeptidase DacD/exodeoxyribonuclease I                             |                             |

*continued...*



**Table S9 (continued)**

| <b>Population</b> | <b>Position</b> | <b>Mutation</b> | <b>Frequency</b> | <b>Annotation</b>      | <b>Locus/Region</b> | <b>Region description</b>                                                                       | <b>Putative link to adaptation</b> |
|-------------------|-----------------|-----------------|------------------|------------------------|---------------------|-------------------------------------------------------------------------------------------------|------------------------------------|
| FS(D)             | 17,10,572       | C→G             | 12.90%           | Q582E (CAA→GAA)        | rsxC →              | SoxR [2Fe-2S] reducing system protein<br>RsxC                                                   | -                                  |
| FS(D)             | 15,54,101       | C→A             | 11.80%           | intergenic (+200/+207) | fdnI → / ← yddM     | formate dehydrogenase N subunit<br>gamma/putative DNA-binding<br>transcriptional regulator YddM | -                                  |
| FS(D)             | 17,10,904       | A→C             | 11.00%           | A692A (GCA→GCC)        | rsxC →              | SoxR [2Fe-2S] reducing system protein<br>RsxC                                                   | -                                  |
| FS(D)             | 25,71,607       | A→C             | 10.40%           | L426R (CTG→CGG)        | eutE ←              | putative aldehyde dehydrogenase,<br>ethanolamine utilization protein                            | -                                  |
| FS(E)             | 22,22,617       | G→C             | 67.50%           | R169G (CGT→GGT)        | bglX ←              | beta-D-glucoside glucohydrolase,<br>periplasmic                                                 | -                                  |
| FS(E)             | 3,939,469:1     | +T              | 54.40%           | coding (110/993 nt)    | rbsR →              | DNA-binding transcriptional dual<br>regulator RbsR                                              | Thymidine metabolism               |
| FS(E)             | 36,59,368       | IS5 (-) +4 bp   | 18.40%           | intergenic (-181/-128) | arrS ← / → gadE     | small regulatory RNA<br>ArrS/DNA-binding transcriptional<br>activator GadE                      | Thymidine metabolism               |
| FS(E)             | 1,26,126        | G→A             | 12.90%           | K144K (AAG→AAA)        | aceF →              | pyruvate dehydrogenase, E2 subunit                                                              | -                                  |
| FS(E)             | 1,07,554        | G→T             | 10.40%           | intergenic (+80/-151)  | lpxC → / → secM     | UDP-3-O-acyl-N-acetylglucosamine<br>deacetylase/SecA translation regulator                      | -                                  |

878 **References**

- 879 1. Bono, Gensel, C. L., Pfennig, D. W. & Burch, C. L. Competition and the origins of  
880 novelty: experimental evolution of niche-width expansion in a virus. *Biol. Lett.* **9**,  
881 20120616 (2013).
- 882 2. Duffy, S., Turner, P. E. & Burch, C. L. Pleiotropic Costs of Niche Expansion in the  
883 RNA Bacteriophage  $\Phi 6$ . *Genetics* **172**, 751–757 (2006).
- 884 3. Duffy, S., Burch, C. L. & Turner, P. E. Evolution of Host Specificity Drives  
885 Reproductive Isolation Among Rna Viruses. *Evolution* **61**, 2614–2622 (2007).
- 886 4. Bono, Gensel, C. L., Pfennig, D. W. & Burch, C. L. Evolutionary rescue and the  
887 coexistence of generalist and specialist competitors: an experimental test. *Proc. R.*  
888 *Soc. B Biol. Sci.* **282**, 20151932 (2015).
- 889 5. Bono, L. M., Smith, L. B., Pfennig, D. W. & Burch, C. L. The emergence of  
890 performance trade-offs during local adaptation: insights from experimental evolution.  
891 *Mol. Ecol.* **26**, 1720–1733 (2017).
- 892 6. Sackman, A. M. & Rokyta, D. R. No Cost of Complexity in Bacteriophages Adapting  
893 to a Complex Environment. *Genetics* **212**, 267–276 (2019).
- 894 7. Velicer, G. J. & Lenski, R. E. Evolutionary Trade-Offs Under Conditions of Resource  
895 Abundance and Scarcity: Experiments with Bacteria. *Ecology* **80**, 1168–1179 (1999).
- 896 8. Kassen, R. & Bell, G. Experimental evolution in *Chlamydomonas*. IV. Selection in  
897 environments that vary through time at different scales. *Heredity* **80**, 732–741 (1998).
- 898 9. Sacristán, S., Fraile, A., Malpica, J. M. & García-Arenal, F. An Analysis of Host  
899 Adaptation and Its Relationship with Virulence in Cucumber mosaic virus.  
900 *Phytopathology* **95**, 827–833 (2005).

- 901 10. Vasilakis, N. *et al.* Mosquitoes Put the Brake on Arbovirus Evolution: Experimental  
902 Evolution Reveals Slower Mutation Accumulation in Mosquito Than Vertebrate  
903 Cells. *PLOS Pathog.* **5**, e1000467 (2009).
- 904 11. Bennett, A. F. & Lenski, R. E. Experimental Evolution and Its Role in Evolutionary  
905 Physiology. *Integr. Comp. Biol.* **39**, 346–362 (1999).
- 906 12. Ostrowski, E. A., Rozen, D. E. & Lenski, R. E. Pleiotropic Effects of Beneficial  
907 Mutations in Escherichia Coli. *Evolution* **59**, 2343–2352 (2005).
- 908 13. Hughes, B. S., Cullum, A. J. & Bennett, A. F. EVOLUTIONARY ADAPTATION  
909 TO ENVIRONMENTAL pH IN EXPERIMENTAL LINEAGES OF ESCHERICHIA  
910 COLI. *Evolution* **61**, 1725–1734 (2007).
- 911 14. Bennett, A. F. & Lenski, R. E. An experimental test of evolutionary trade-offs during  
912 temperature adaptation. *Proc. Natl. Acad. Sci.* **104**, 8649–8654 (2007).
- 913 15. Satterwhite, R. S. & Cooper, T. F. Constraints on adaptation of Escherichia coli to  
914 mixed-resource environments increase over time. *Evolution* **69**, 2067–2078 (2015).
- 915 16. Karve, S. M., Bhave, D., Nevgi, D. & Dey, S. Escherichia coli populations adapt to  
916 complex, unpredictable fluctuations by minimizing trade-offs across environments. *J.*  
917 *Evol. Biol.* **29**, 2545–2555 (2016).
- 918 17. Karve, S. M., Bhave, D. & Dey, S. Extent of adaptation is not limited by  
919 unpredictability of the environment in laboratory populations of Escherichia coli. *J.*  
920 *Evol. Biol.* **31**, 1420–1426 (2018).
- 921 18. Nidelet, T. & Kaltz, O. Direct and Correlated Responses to Selection in a Host–  
922 Parasite System: Testing for the Emergence of Genotype Specificity. *Evolution* **61**,  
923 1803–1811 (2007).

- 924 19. Roemhild, R., Barbosa, C., Beardmore, R. E., Jansen, G. & Schulenburg, H. Temporal  
925 variation in antibiotic environments slows down resistance evolution in pathogenic  
926 *Pseudomonas aeruginosa*. *Evol. Appl.* **8**, 945–955 (2015).
- 927 20. Buckling, A., Kassen, R., Bell, G. & Rainey, P. B. Disturbance and diversity in  
928 experimental microcosms. *Nature* **408**, 961 (2000).
- 929 21. Friman, V.-P. & Buckling, A. Effects of predation on real-time host–parasite  
930 coevolutionary dynamics. *Ecol. Lett.* **16**, 39–46 (2013).
- 931 22. Buckling, A., Brockhurst, M. A., Travisano, M. & Rainey, P. B. Experimental  
932 adaptation to high and low quality environments under different scales of temporal  
933 variation. *J. Evol. Biol.* **20**, 296–300 (2007).
- 934 23. Jasmin, J.-N. & Kassen, R. On the experimental evolution of specialization and  
935 diversity in heterogeneous environments. *Ecol. Lett.* **10**, 272–281 (2007).
- 936 24. Jasmin, J.-N. & Kassen, R. Evolution of a single niche specialist in variable  
937 environments. *Proc. R. Soc. Lond. B Biol. Sci.* **274**, 2761–2767 (2007).
- 938 25. Wenger, J. W. *et al.* Hunger Artists: Yeast Adapted to Carbon Limitation Show  
939 Trade-Offs under Carbon Sufficiency. *PLOS Genet.* **7**, e1002202 (2011).
- 940 26. Jasmin, J.-N. & Zeyl, C. Evolution of pleiotropic costs in experimental populations. *J.*  
941 *Evol. Biol.* **26**, 1363–1369 (2013).
- 942 27. Jerison, E. R., Nguyen Ba, A. N., Desai, M. M. & Kryazhimskiy, S. Chance and  
943 necessity in the pleiotropic consequences of adaptation for budding yeast. *Nat. Ecol.*  
944 *Evol.* **4**, 601–611 (2020).
- 945 28. Chen, P. & Zhang, J. Antagonistic pleiotropy conceals molecular adaptations in  
946 changing environments. *Nat. Ecol. Evol.* **4**, 461–469 (2020).

- 947 29. Ketola, T. & Saarinen, K. Experimental evolution in fluctuating environments:  
948 tolerance measurements at constant temperatures incorrectly predict the ability to  
949 tolerate fluctuating temperatures. *J. Evol. Biol.* **28**, 800–806 (2015).
- 950 30. Ciota, A. T., Payne, A. F., Ngo, K. A. & Kramer, L. D. Consequences of in vitro host  
951 shift for St. Louis encephalitis virus. *J. Gen. Virol.* **95**, 1281–1288 (2014).
- 952 31. Cohen, J. *Statistical power analysis for the behavioral sciences*. (L. Erlbaum  
953 Associates, 1988).
- 954 32. Chavhan, Y., Malusare, S. & Dey, S. Larger bacterial populations evolve heavier  
955 fitness trade-offs and undergo greater ecological specialization. *Heredity* **124**, 726–  
956 736 (2020).
